# Supplementary material for: Relationship between islet autoantibody status and the clinical characteristics of children and adults with incident type 1 diabetes in a UK cohort
Source: PubMed Central journal article supplement — BMJ Open. 2018 Apr 4;8(4):e020904. doi: 10.1136/bmjopen-2017-020904 (PMC5893930; doi:10.1136/bmjopen-2017-020904), 2018-04-04
Supplement: bmjopen-2017-020904.draft_revisions.pdf [file bmjopen-2017-020904.draft_revisions.pdf]

# BMJ Open

BMJ Open is committed to open peer review. As part of this commitment we make the peer review history of every article we publish publicly available.

When an article is published we post the peer reviewers' comments and the authors' responses online. We also post the versions of the paper that were used during peer review. These are the versions that the peer review comments apply to.

The versions of the paper that follow are the versions that were submitted during the peer review process. They are not the versions of record or the final published versions. They should not be cited or distributed as the published version of this manuscript.

BMJ Open is an open access journal and the full, final, typeset and author-corrected version of record of the manuscript is available on our site with no access controls, subscription charges or pay-per-view fees (<http://bmjopen.bmj.com>).

If you have any questions on BMJ Open's open peer review process please email [info.bmjopen@bmj.com](mailto:info.bmjopen@bmj.com)

# BMJ Open

## The relationship between islet autoantibody status and the clinical characteristics of children and adults with incident type 1 diabetes in a UK cohort

|                                 |                                                                                                                                                                                                                                                                                                                                                                                                                                                                                                                                                                                                                                                                                                                                                 |
|---------------------------------|-------------------------------------------------------------------------------------------------------------------------------------------------------------------------------------------------------------------------------------------------------------------------------------------------------------------------------------------------------------------------------------------------------------------------------------------------------------------------------------------------------------------------------------------------------------------------------------------------------------------------------------------------------------------------------------------------------------------------------------------------|
| Journal:                        | <i>BMJ Open</i>                                                                                                                                                                                                                                                                                                                                                                                                                                                                                                                                                                                                                                                                                                                                 |
| Manuscript ID                   | bmjopen-2017-020904                                                                                                                                                                                                                                                                                                                                                                                                                                                                                                                                                                                                                                                                                                                             |
| Article Type:                   | Research                                                                                                                                                                                                                                                                                                                                                                                                                                                                                                                                                                                                                                                                                                                                        |
| Date Submitted by the Author:   | 30-Nov-2017                                                                                                                                                                                                                                                                                                                                                                                                                                                                                                                                                                                                                                                                                                                                     |
| Complete List of Authors:       | Bravis, Vassiliki; Imperial College London, Medicine<br>Kaur, Akaal; Imperial College London, Medicine<br>Walkey, Helen; Imperial College London, Medicine<br>Godsland, Ian; Imperial College London, Endocrinology and Metabolic Medicine<br>Misra, Shivani; Imperial College London, Medicine<br>Bingley, Polly; University of Bristol, School of Clinical Sciences<br>Williams, Alistair; University of Bristol, School of Clinical Sciences<br>Dunger, David; University of Cambridge, Paediatrics<br>Dayan, Colin; Cardiff University School of Medicine<br>Peakman, Mark; King's College London, Department of Immunobiology<br>Oliver, Nick; Imperial College, Endocrinology and Diabetes<br>Johnston, Desmond; Imperial College London, |
| <b>Primary Subject Heading</b>: | Diabetes and endocrinology                                                                                                                                                                                                                                                                                                                                                                                                                                                                                                                                                                                                                                                                                                                      |
| Secondary Subject Heading:      | Epidemiology                                                                                                                                                                                                                                                                                                                                                                                                                                                                                                                                                                                                                                                                                                                                    |
| Keywords:                       | General diabetes < DIABETES & ENDOCRINOLOGY, EPIDEMIOLOGY, IMMUNOLOGY, Paediatric endocrinology < PAEDIATRICS, DIABETES & ENDOCRINOLOGY                                                                                                                                                                                                                                                                                                                                                                                                                                                                                                                                                                                                         |
|                                 |                                                                                                                                                                                                                                                                                                                                                                                                                                                                                                                                                                                                                                                                                                                                                 |

SCHOLARONE™  
Manuscripts

1 **TITLE: The relationship between islet autoantibody status and the clinical**  
2 **characteristics of children and adults with incident type 1 diabetes in a UK**  
3 **cohort**  
4  
5  
6  
7  
8  
9  
10

11 **CORRESPONDING AUTHOR:** Dr Helen C Walkey, Department of Medicine, Imperial  
12 College London, G3, Medical School, Norfolk Place, London, W2 1PG, UK. Email:  
13 [h.walkey@imperial.ac.uk](mailto:h.walkey@imperial.ac.uk); telephone: +44(0)20 7594 1316.  
14  
15  
16  
17  
18  
19  
20

21 **AUTHORS:** Vassiliki Bravis V<sup>1</sup>, Akaal Kaur<sup>1</sup>, Helen C Walkey<sup>1</sup>, Ian F Godsland<sup>1</sup>,  
22 Shivani Misra<sup>1</sup>, Polly J Bingley<sup>2</sup>, Alistair JK Williams<sup>2</sup>, David B Dunger<sup>3</sup>, Colin M  
23 Dayan<sup>4</sup>, Mark Peakman<sup>5</sup>, Nick S Oliver<sup>1</sup>, and Desmond G Johnston<sup>1</sup> on behalf of the  
24 ADDRESS-2 Management Committee, Patient Advocate Group and Investigators.  
25  
26  
27

28 <sup>1</sup>Department of Medicine, Imperial College London, Medical School, Norfolk Place  
29 London, W2 1PG, UK  
30  
31  
32  
33

34 <sup>2</sup>School of Clinical Sciences, University of Bristol, Southmead Hospital, Bristol, BS10  
35 5NB, UK  
36  
37

38 <sup>3</sup>Department of Paediatrics, University of Cambridge, Box 116, Level 8, Cambridge  
39 Biomedical Campus, Cambridge, CB2 0QQ, UK  
40  
41  
42

43 <sup>4</sup>School of Medicine, Cardiff University, Health Park, Cardiff, CF14 4XN, Wales, UK  
44

45 <sup>5</sup>Department of Immunobiology, King's College London, Guy's Hospital, Great Maze  
46 Pond, London, SE1 9RT, UK  
47  
48  
49  
50

51 **WORD COUNT:** 3,680  
52  
53  
54  
55  
56  
57  
58  
59  
60

**COLLABORATORS****ADDRESS-2 Management Committee, Patient Advocate Group and****Investigators:**

AbithaKujambal V; Abouglila K; Ahmed J; Ahmed K; Ahmed M; Ahmed Z; Ajjan R;  
Akiboye F; Ali A; Ali K; Anand B; Anderson C; Andrews R; Anjum B; Anthony S; Aung  
T; Ayoola O; Baburaj R; Bain S; Baker E; Baksi A; Banerjee K; Banerjee M; Barnes D;  
Barnet A; Baynes K; Bellary S; Bennett S; Besser R; Bhardwaj P; Bhattacharya B;  
Bhimsaria S; Bickerton A; Bilous R; Bingham E; Bodmer C; Bridges N; Brooks A;  
Browne D; Buck J; Cackett N; Caldwell G; Campbell F; Carey P; Cavan D; Chandran  
S; Chandrasakaren S; Chang J; Chankramath A; Chant T; Chapman J; Chattington P;  
Chenoweth H; Chetan R; Chong J; Choudhary P; Cifelli P; Clark J; Cliff P; Coldwell S;  
Cooper C; Coppini D; Creely S; Cronin M; Cummings M; Dang C; Darzy K; Dashora  
U; Davies J; Davies M; Davies R; Day P; De Silva P; DelRio A; Delrio A; Desilva P;  
Dornhorst A; Douek I; Dougherty I; Dukhan K; Durkin S; Dutta A; Dutta S; Earle K;  
Edge J; Edmonds C; Edwards M; Elmati A; El-Reftee S; Elrishi M; Evans M; Field B;  
Flanagan D; Franke B; Gable D; Galliford T; Ganapathi J; Gibbs J; Gibson M; Gnudi L;  
Gough A; Gough S; Goulden P; Govier K; Greening J; Gupta A; Gupta S; Gurnell E;  
Hamilton-Shield J; Hammond P; Han T; Hanna F; Hanson P; Haq M; Hardy K; Harms  
B; Hattersley A; Hayward J; Heald A; Heffernan H; Heller S; Hinde F; Hitman G; Holt  
H; Howell S; Huma Z; Hyer S; Ian O; Idris I; Ijaz S; Iqbal N; Issa B; Jackson A;  
Jackson A; Jain N; Jennings P; John K; Johnson R; Jones S; Joseph F; Joseph J;  
Joseph S; Kalathil S; Kanumilli N; Kapoor R; Karandikar S; Kelly P; Kershaw M;  
Khetriwal B; Kumar K; Laji K; Lakhdar A; Lawrence J; Leong K; Levy D; Lowe A; Lyder  
G; Macklin A; Mallam K; Mallik R; Mann N; Mansell P; Margabanthu G; Massoud A;  
Mathew V; McAulay A; McCowen E; McCrea K; McGuigan M; Medici F; Mettayill J;

1 Millward A; Mitchell C; Modgil G; Mohanty R; Moodambail A; Mosely A; Moudiotis C;  
2  
3  
4 Muhi-Iddin N; Mukhtar M; Murphy N; Muzulu S; Myint K; Nagi D; Naik S; Narendran P;  
5  
6 Natarajan A; Nathan Y; Nayar R; Ng M; Ngwu U; Nikookam K; O'Connell I; Oelbaum  
7  
8 R; O'Hare P; Oliver N; O'Malley B; Oso O; Overend L; Owen C; Owen K; Padinjakara  
9  
10 N; Pai B; Pang T; Pargass N; Patel K; Pathy K; Paul P; Paul Smith J; Peakman M;  
11  
12 Petit A; Pettit A; Piel B; Pope R; Pothina N; Pothina N; Price H; Purewal T; Puthi V;  
13  
14 Puttha R; Puttha R; Rabbi T; Raffeeq P; Rahman S; Ranashinghe A; Randell T; Rathi  
15  
16 S; Rawal S; Rayman G; Regan F; Rice S; Riddle M; Robertson E; Robinson M;  
17  
18 Russell-Jones D; Russell-Taylor M; Rutter M; Sampson M; Samuel J; Sankar S;  
19  
20 Sankar V; Saravanan P; Satish H; Savine R; Scanlon J; Scobie I; Sennik D; Sharpe R;  
21  
22 Shekar S; Shekhar S; Simon G; Simpson H; Singh B; Singhal P; Smith D; Smith J;  
23  
24 Smith P; Solomon H; Srinivasan B; Sriraman R; Stirling H; Strutt J; Surridge A;  
25  
26 Sutchfield P; Tatnell S; Tharian K; Timmis A; Trevelyan N; Turner B; Valabhji J;  
27  
28 Venkatesh U; Vijayaraghavan S; Vijayaraman A; Vithian K; Vora J; Waldron-Lynch F;  
29  
30 Walker M; Walmsley D; Ward W; Watt A; Weaver J; Webber J; Weerasinghe K; West  
31  
32 N; Whitehead P; Whitelaw D; Wickramasuriya N; Wilding J; Williams P; Williams S;  
33  
34 Winkley K; Wright N; and Yaliwal C; Yarlagaadda S; Zac-Varghese S  
35  
36  
37  
38  
39  
40  
41  
42  
43  
44  
45  
46  
47  
48  
49  
50  
51  
52  
53  
54  
55  
56  
57  
58  
59  
60

## ABSTRACT

**Objectives:** To describe the characteristics of children and adults with incident type 1 diabetes in contemporary, multi-ethnic UK, focusing on differences between the islet autoantibody negative and positive.

**Design:** Observational cohort study.

**Setting:** 146 mainly secondary care centres across England and Wales.

**Participants:** 3,312 people aged  $\geq 5$  years were recruited within 6 months of a clinical diagnosis of type 1 diabetes via the National Institute for Health Research Clinical Research Network. 3,021 were of white European ethnicity and 291 (9%) were non-white. There was a small male predominance (57%). Young people  $< 17$  years comprised 59%.

**Main outcome measures:** Autoantibody status and characteristics at presentation.

**Results:** The majority presented with classical osmotic symptoms, weight loss, and fatigue. Ketoacidosis was common (42%), especially in adults, and irrespective of ethnicity. Of the 1,778 participants who donated a blood sample, 85% were positive for one or more autoantibodies against glutamate decarboxylase, islet antigen-2, and zinc transporter 8. Presenting symptoms were similar in the autoantibody positive and negative participants, as was the frequency of ketoacidosis (43% vs 40%,  $p=0.3$ ). Autoantibody positivity was less common with increasing age ( $p=0.0001$ ), in males compared with females (82% vs 90%,  $p<0.0001$ ) and in people of non-white compared with white ethnicity (73% vs 86%,  $p<0.0001$ ). Body mass index was higher in autoantibody negative than positive adults (median, IQR 25.5, 23.1-29.2 vs 23.9, 21.4-26.7  $\text{kg/m}^2$ ;  $p=0.0001$ ). Autoantibody negative participants were more likely to

1 have a parent with diabetes (28% vs 16%,  $p < 0.0001$ ) and less likely to have another  
2  
3 autoimmune disease (4% vs 8%,  $p = 0.01$ ).  
4  
5

6 **Conclusions:** Most people assigned a diagnosis of type 1 diabetes presented with  
7 classical clinical features and islet autoantibodies. Although indistinguishable at an  
8 individual level, autoantibody negative participants as a group demonstrated features  
9 more typically associated with other diabetes subtypes.  
10  
11  
12  
13  
14  
15  
16  
17  
18  
19  
20  
21  
22  
23  
24  
25  
26  
27  
28  
29  
30  
31  
32  
33  
34  
35  
36  
37  
38  
39  
40  
41  
42  
43  
44  
45  
46  
47  
48  
49  
50  
51  
52  
53  
54  
55  
56  
57  
58  
59  
60

For peer review only

## STRENGTHS AND LIMITATIONS OF THE STUDY

- We have studied a large multi-ethnic cohort of adults and children  $\geq 5$  years with clinically diagnosed incident type 1 diabetes in whom pancreatic islet autoantibodies were measured in a central laboratory.
- In routine practice, the initial assignment of a diagnosis of type 1 diabetes is a purely clinical one. The lack of further selection before inclusion in this study (e.g. based on autoantibody status and/or genetic testing) renders the results of particular relevance to standard clinical care.
- Individual autoantibody positive and negative patients were indistinguishable clinically but the size and diversity of the cohort permitted group differences to be detected at high levels of statistical significance, suggesting diagnostic heterogeneity.
- As this was a volunteer study recruiting from mainly secondary care centres, ascertainment bias could have been introduced.
- Provision of a blood sample was optional and autoantibody status was therefore available in just over half of the patients. Other than having a higher median age, this sub-group was representative of the whole cohort.



## INTRODUCTION

Type 1 diabetes (T1D) is an autoimmune disease that develops at any age, but most frequently in children and young adults.<sup>1</sup> Autoantibodies against islet antigens are typically present before, and for a variable time following, diagnosis.<sup>2-6</sup> Once initiated, beta cell damage classically leads to progressive loss of insulin secretion and a need for lifelong insulin treatment.

The diagnosis of T1D is a clinical one, but may be supported by the presence of one or more of the autoantibodies to islet-cell antigens. In routine care, autoantibody status may not be available at diagnosis, and may never be checked (management guidelines differ, with some not recommending their routine measurement or restricting measurements to situations where there is clinical doubt).<sup>7-9</sup> Previous studies suggest that 80-90% have detectable autoantibodies at disease onset,<sup>2,10</sup> with a background autoantibody prevalence of around 2% in the young general population.<sup>11</sup>

Autoantibody positivity may be lower in some non-white ethnic groups.<sup>12-14</sup> There is however uncertainty around the clinical and demographic correlates of autoantibody status in incident disease in an unselected multi-ethnic cohort including children and adults, using well characterised, validated assays. The After Diabetes Diagnosis REsearch Support System (ADDRESS), supported by the National Institute for Health Research (NIHR) Clinical Research Network (CRN), recruits people with incident T1D from centres across England and Wales. We aimed to characterise these people with reference to their autoantibody status.

## **METHODS**

### **Ethics approval**

Ethical approval was obtained from the South Central – Berkshire NHS Research Ethics Committee (reference 10/H0505/85). The project complies with the recommendations for research on human subjects by the 18th World Medical Assembly, Helsinki 1964 and later revisions and the International Conference on Harmonization Guideline for Good Clinical Practice (Topic E6 - 10 June 1996). Protocol details have been reported previously<sup>15</sup> and are therefore described in brief only.

### **Inclusion and exclusion criteria**

People with a clinician-assigned diagnosis of T1D aged  $\geq 5$  years were recruited within 6 months of diagnosis. Written, informed consent was obtained for all participants.

### **Data collection**

On recruitment: demographic information; medications including insulin(s); medical history, including that of autoimmune disease; family history of diabetes; blood pressure; weight and height; HbA1c; fasting or random blood glucose. A diagnosis of ketoacidosis was recorded if clinically assigned or if hyperglycaemia was accompanied by acidosis and either ketonaemia or ketonuria.<sup>15</sup> Ethnicity was self-reported as one of 16 categories.<sup>15</sup>

### **Project-specific blood sampling and measurement of islet autoantibodies**

Sample donation was voluntary.<sup>15</sup> Where collected, autoantibodies to glutamate decarboxylase (GADA), islet antigen-2 (IA-2A), and zinc transporter 8 (ZnT8A) were measured in sera using established radiobinding assays<sup>16 17</sup> in a single central laboratory. Antibodies to both major ZnT8 isoforms, defined by the polymorphic amino

1 acid at position 325 (Arginine, ZnT8RA or Tryptophan, ZnT8WA), were measured  
2 separately. Thresholds for autoantibody positivity were set at the 97<sup>th</sup> percentile of 974  
3 control samples for GADA, the 98<sup>th</sup> percentile of 500 control samples for IA-2A, and  
4 the 97·5<sup>th</sup> percentile of 523 healthy schoolchildren for both ZnT8RA and ZnT8WA.  
5  
6 Positive autoantibody status was defined as positive for one or more of GADA, IA-2A  
7 or either form of ZnT8A. In the 2015 Islet Autoantibody Standardization Program  
8 Workshop, the assay sensitivities and specificities achieved were 74% and 96·7% for  
9 GADA; 72% and 100% for IA-2A; 60% and 100% for ZnT8RA, and 46% and 100% for  
10 ZnT8WA, respectively.  
11  
12  
13  
14  
15  
16  
17  
18  
19  
20  
21  
22

### 23 **Data analysis**

24  
25  
26 Children were defined as aged <17 years. Body mass index (BMI) was derived as a z-  
27 score for children using World Health Organisation (2007) reference data.<sup>18</sup> As a  
28 criterion for adiposity shared between children and adults, we applied a definition of  
29 'normal' weight (z-score <1 for children, BMI <25kg/m<sup>2</sup> for adults, both including  
30 underweight) as distinguished from 'overweight' (z-score ≥1 for children,<sup>19</sup> BMI  
31 ≥25kg/m<sup>2</sup> for adults,<sup>20</sup> both including obese). Parental and sibling history of diabetes  
32 was recorded. No attempt was made to differentiate between diabetes types in the  
33 family history. Variables were categorized as 'Individual Characteristics' and 'Diabetes  
34 Presentation'. We analysed data from participants recruited between 1<sup>st</sup> September  
35 2011 and 30<sup>th</sup> April 2016, with data querying and verification completed in November  
36 2016.  
37  
38  
39  
40  
41  
42  
43  
44  
45  
46  
47  
48  
49

### 50 **Statistical analysis**

51  
52  
53 Statistical analysis was carried out using StataCorp. 2013 (*Stata Statistical Software:  
54 Release 13*. College Station, TX: StataCorp LP). Median and interquartile ranges  
55  
56  
57

1 (IQRs) were used to summarize continuous variables. Categorical variables were  
2  
3 summarized as percentages. The Mann-Whitney U test and Kruskal-Wallis test were  
4  
5 used for between-group comparisons of continuous variables. Chi-square testing was  
6  
7 used for comparisons of categorical variables. Individual characteristics were explored  
8  
9 as predictors of diabetes presentation and antibody status in univariate logistic and  
10  
11 linear regression analyses. Multiple logistic and linear regression were used to  
12  
13 establish the independence of predictors. For regression analyses, non-normally  
14  
15 distributed continuous variables were transformed to normalize their distributions. A  
16  
17 significance level of  $p < 0.05$  (two-sided) was taken as a guide to interpretation (actual  $p$   
18  
19 values down to  $p < 0.0001$  are reported throughout).  
20  
21  
22

### 23 **Patient involvement**

24 Patient and public involvement groups within the NIHR CRN representing people with  
25  
26 diabetes, and representing children and young people, had input into the design of the  
27  
28 patient information sheets, consent forms, and recruitment strategies. After the start of  
29  
30 recruitment, a patient advocate group was established to have input into aspects of  
31  
32 study design and conduct, such as the procedures for accessing the data and stored  
33  
34 biological samples, and communication with and engagement of participants, people  
35  
36 living with T1D, and healthcare professionals. The group is made up of adults with  
37  
38 type 1 diabetes and the parents of children with type 1 diabetes. Results are  
39  
40 disseminated to participants via newsletters and other information about the study is  
41  
42 published on the study website and on social media.  
43  
44  
45  
46  
47  
48  
49  
50  
51  
52  
53  
54  
55  
56  
57  
58  
59  
60

## RESULTS

### Cohort characteristics

Data were analyzed for 3,312 participants recruited with incident T1D (1,879 (57%) males, 1,946 (59%) children, from 146 centres, Table 1). The slight male predominance was more prominent in adults than in children (61% versus 54%,  $p < 0.0001$ , Table 2). Islet autoantibodies were measured in the 1,778 participants who donated an optional blood sample. For individual characteristics, data recording was >98% complete for all variables except BMI (and 'overweight' - 88%) and records of having a sibling with diabetes (91%). Data recording for diabetes presentation features was >98% complete for all variables except symptom duration (94%). Sample sizes for incomplete data are reported in Figure 1 and Tables 1-3. Of the total cohort, people of white European origin comprised 91% ( $n=3021$ ), Asian (not Chinese) 3% ( $n=107$ ), African-Caribbean 2% ( $n=63$ ) and other or mixed ethnicity 3% ( $n=121$ ). Median time from diagnosis to recruitment was 71 days (IQR 40-119) and to blood sampling, 75 days (IQR 42-126). Of those with body weight measured ( $n=2911$ ), 35% were classified as overweight or obese, more commonly in adults than children (41% versus 31%,  $p < 0.0001$ , Table 2).

**Table 1. Clinical and demographic characteristics of the cohort (n=3312).**

|                                           | median (IQR) /<br>percentage (n) |
|-------------------------------------------|----------------------------------|
| <b>INDIVIDUAL CHARACTERISTICS</b>         |                                  |
| Age (years) (n=3312)                      | 14·6 (10·4, 26·4)                |
| Male (n=3312)                             | 57 (1879)                        |
| Children (<17y) (n=3312)                  | 59 (1946)                        |
| Body mass index (n=2911)                  |                                  |
| <i>Children (z score, n=1676)</i>         | 0·44 (-0·28, 1·23)               |
| <i>Adult (kg/cm<sup>2</sup>, n=1235)</i>  | 24·1 (21·5, 27·1)                |
| Overweight or obese (n=2911)              | 35 (1033)                        |
| White European ethnicity (n=3312)         | 91 (3021)                        |
| Other autoimmune disease present (n=3270) | 6 (204)                          |
| Parent(s) with any diabetes (n=3261)      | 15 (499)                         |
| Sibling with any diabetes (n=3003)        | 8 (229)                          |
| <b>DIABETES PRESENTATION</b>              |                                  |
| Clinical presentation                     |                                  |
| <i>Ketoacidosis (n=3242)</i>              | 42 (1348)                        |
| <i>Osmotic symptoms (n=3286)</i>          | 96 (3158)                        |
| <i>Weight loss (n=3251)</i>               | 85 (2753)                        |
| <i>Fatigue (n=3252)</i>                   | 82 (2682)                        |
| Symptom duration (weeks, n=3105)          | 3 (2, 6)                         |
| Antibody positive (n=1778)                | 85 (1510)                        |

Abbreviations: IQR: interquartile range; BMI, body mass index.

Sample sizes (n) are given for each variable if data collection was incomplete.

Data collection for ketoacidosis at diabetes presentation was based on a record of it being assigned clinically, or of hyperglycaemia accompanied by acidosis and either ketonaemia or ketonuria.

**Table 2. Characteristics of children and adults; percentages (n) or medians (IQR) are shown.**

|                                            | Children (n=1946) | Adults (n=1366)   | p       |
|--------------------------------------------|-------------------|-------------------|---------|
| <b>INDIVIDUAL CHARACTERISTICS</b>          |                   |                   |         |
| Age (years)                                | 11·1 (8·5, 13·5)  | 29·6 (22·9, 39·8) | NA      |
| Male                                       | 54 (1048)         | 61 (831)          | <0·0001 |
| Overweight (n=1676, 1235)                  | 31 (527)          | 41 (506)          | <0·0001 |
| White European ethnicity                   | 90 (1750)         | 93 (1271)         | 0·001   |
| Other autoimmune disease (n=1915, 1355)    | 4 (82)            | 9 (122)           | <0·0001 |
| Parent(s) with any diabetes (n=1920, 1341) | 12 (223)          | 21 (276)          | <0·0001 |
| Siblings with any diabetes (n=1769, 1234)  | 6 (100)           | 10 (129)          | <0·0001 |
| <b>DIABETES PRESENTATION</b>               |                   |                   |         |
| Clinical presentation                      |                   |                   |         |
| <i>Ketoacidosis (n=1912, 1330)</i>         | 39 (744)          | 45 (604)          | 0·0002  |
| <i>Osmotic symptoms (n=1935, 1351)</i>     | 97 (1877)         | 95 (1281)         | 0·001   |
| <i>Weight Loss (n=1907, 1344)</i>          | 82 (1556)         | 89 (1197)         | <0·0001 |
| <i>Fatigue (n=1904, 1348)</i>              | 78 (1493)         | 88 (1189)         | <0·0001 |
| Symptom Duration (weeks, n=1844, 1261))    | 3 (2, 4)          | 4 (2·5, 8)        | 0·0001  |
| Antibody positive (n=680, 1098)            | 90 (614)          | 82 (896)          | <0·0001 |

Sample sizes (n) are given for each variable if data collection was incomplete.

## Relationships between clinical presentation and individual characteristics

The main presenting features (Table 1) were: osmotic symptoms (polyuria and/or polydipsia) 96%; weight loss 85%; and fatigue 82%. Ketoacidosis was identified at clinical presentation in 42%. Another autoimmune disease was present in 6%; 15% had a parent with diabetes; 8% had a sibling with diabetes. One or more autoantibodies were present in 85% of those in whom they were measured.

*Effect of age, and characteristics of children versus adults:* Increasing age was independently associated with an increased prevalence of ketoacidosis, weight loss, and fatigue at presentation, and decreased prevalence of osmotic symptoms, longer symptom duration, and lower antibody positivity (Figure 1). Although significant statistically, the differences between children and adults in presenting symptoms were small, as were significant differences in symptom duration (Table 2). Ketoacidosis was less common in children than adults (Table 2, 39% versus 45%,  $p=0.0002$ ). Children were more likely than adults to be positive for one or more islet autoantibodies (90% vs 82%,  $p<0.0001$ ).

*Sex:* Female sex was independently associated with longer symptom duration and increased prevalence of autoantibodies (Figure 1). Median symptom duration in females and males were 4 and 3 weeks, respectively ( $p=0.0001$ ); the prevalence of islet autoantibody positivity was 90% and 82%, respectively ( $p<0.0001$ ).

*Ethnicity:* Ethnicity was a significant determinant of autoantibody status (on chi-squared analysis,  $p<0.0001$ ). Amongst the 3 major non-white ethnic groups (Asian; African-Caribbean; other or mixed ethnicity) numbers with autoantibodies measured were small ( $n=46$ , 36 and 51, respectively) and the proportion with autoantibody positivity did not differ significantly (70%, 64% and 82%, respectively;  $p=0.1$ ). People of non-white ethnic origin were therefore grouped and comparisons limited to white European versus non-white ethnic origin. White European ethnicity was independently



1 associated with a higher prevalence of autoantibody positivity compared with the  
2 combined non-white group (86% and 73%, respectively;  $p<0.0001$ , Table 3 and Figure  
3 1). There were no other significant associations between ethnicity and initial clinical  
4 presentation and ketoacidosis was equally likely (white Europeans, 41%; non-white,  
5 44%;  $p=0.3$ , Table 3).

6  
7  
8  
9  
10  
11  
12 *Other autoimmune disease:* Another autoimmune disease was present in 204  
13 participants and 117 of those in whom autoantibodies were measured. A history of  
14 another autoimmune disease was positively associated with autoantibody positivity  
15 ( $p=0.01$ , Figure 1), being present in 8% of the autoantibody positive and 4% of the  
16 autoantibody negative participants (Table 4).

17  
18  
19  
20  
21  
22  
23 *Family history of diabetes:* Having a parent with any diabetes was associated with a  
24 lower probability of presenting with ketoacidosis; such people were also less likely to  
25 have autoantibodies (Figure 1). The proportion of those with ketoacidosis at  
26 presentation who had a parent with diabetes was 12% versus 18% of those without  
27 ketoacidosis ( $p<0.0001$ ). The proportion of those who were autoantibody positive and  
28 who had a parent with any diabetes was 16% versus 28% of those who were  
29 autoantibody negative ( $p<0.0001$ , Table 4). Having a sibling with diabetes was also  
30 independently negatively associated with presentation with ketoacidosis (Figure 1).  
31 The proportion of those with ketoacidosis who had a sibling with any diabetes was 5%  
32 compared with 10% of those without ketoacidosis ( $p<0.0001$ ).

**Table 3. Characteristics of participants of white European ethnicity and non-white ethnicity; percentages (n) or medians (IQR) are shown.**

|                                            | White European<br>(n=3021) | Non-white ethnicity<br>European (n=291) | p      |
|--------------------------------------------|----------------------------|-----------------------------------------|--------|
| <b>INDIVIDUAL CHARACTERISTICS</b>          |                            |                                         |        |
| Age (years)                                | 14.8 (10.5, 26.6)          | 12.7 (9.0, 23.7)                        | <0.001 |
| Male                                       | 57 (1713)                  | 57 (166)                                | 0.9    |
| Children                                   | 58 (1750)                  | 67 (196)                                | 0.002  |
| Body mass index                            |                            |                                         |        |
| <i>Children (z score, n=1507, 169)</i>     | 0.42 (-0.28, 1.20)         | 0.48 (-0.32, 1.45)                      | 0.5    |
| <i>Adult (kg/cm<sup>2</sup>, 1151, 84)</i> | 24.0 (21.5, 27.1)          | 24.8 (22.6, 27.2)                       | 0.1    |
| Overweight (n=2658, 253)                   | 35 (935)                   | 39 (98)                                 | 0.2    |
| Other autoimmune disease (n=1981, 289)     | 6 (184)                    | 7 (20)                                  | 0.6    |
| Parent(s) with any diabetes (n=2976, 285)  | 15 (444)                   | 19 (55)                                 | 0.05   |
| Siblings with any diabetes (n=2751, 252)   | 7 (204)                    | 10 (25)                                 | 0.1    |
| <b>DIABETES PRESENTATION</b>               |                            |                                         |        |
| Clinical presentation                      |                            |                                         |        |
| <i>Ketoacidosis (n=2960, 282)</i>          | 41 (1224)                  | 44 (124)                                | 0.3    |
| <i>Osmotic symptoms (n=2997, 289)</i>      | 96 (2879)                  | 97 (279)                                | 0.6    |
| <i>Weight loss (n=2964, 287)</i>           | 84 (2503)                  | 87 (250)                                | 0.2    |
| <i>Fatigue (n=2970, 282)</i>               | 82 (2449)                  | 83 (233)                                | 0.9    |
| Symptom duration (weeks, n=2840, 265))     | 4 (2, 6)                   | 3 (2, 6)                                | 0.02   |
| Antibody positive (n=1645, 133)            | 86 (1413)                  | 73 (97)                                 | <0.001 |

Sample sizes (n) are given for each variable if data collection was incomplete.

**Table 4. Characteristics of pancreatic autoantibody (Ab) positive and negative participants (n=1778 with known antibody status); percentages (n) or medians (IQR) are shown.**

|                                              | Ab<br>(n=1510)     | positive<br>Ab negative<br>(n=268) | p       |
|----------------------------------------------|--------------------|------------------------------------|---------|
| <b>INDIVIDUAL CHARACTERISTICS</b>            |                    |                                    |         |
| Age                                          | 20.1 (13.1, 31.1)  | 31.4 (17.7, 41.0)                  | 0.0001  |
| Male                                         | 56 (851)           | 72 (192)                           | <0.0001 |
| Children                                     | 41 (614)           | 25 (66)                            | <0.0001 |
| Body mass index                              |                    |                                    |         |
| <i>Children (z score, n=545, 56)</i>         | 0.41 (-0.35, 1.19) | 0.47 (-0.48, 0.97)                 | 0.4     |
| <i>Adult (kg/cm<sup>2</sup>, n=825, 184)</i> | 23.9 (21.4, 26.7)  | 25.5 (23.1, 29.2)                  | 0.0001  |
| Overweight (n=1370, 240)                     | 36 (490)           | 48 (114)                           | 0.0005  |
| White European ethnicity                     | 86 (1413)          | 14 (232)                           | <0.0001 |
| Other autoimmune disease (n=1495, 265)       | 8 (117)            | 4 (10)                             | 0.01    |
| Parent(s) with any diabetes (n=1493, 261)    | 16 (233)           | 28 (74)                            | <0.0001 |
| Siblings with any diabetes (n=1374, 238)     | 9 (117)            | 8 (20)                             | 0.9     |
| <b>DIABETES PRESENTATION</b>                 |                    |                                    |         |
| <b>Clinical presentation</b>                 |                    |                                    |         |
| <i>Ketoacidosis (n=1483, 260)</i>            | 43 (639)           | 40 (104)                           | 0.3     |
| <i>Osmotic symptoms (n=1495, 267)</i>        | 97 (1444)          | 94 (250)                           | 0.02    |
| <i>Weight loss (n=1480, 267)</i>             | 87 (1285)          | 88 (235)                           | 0.5     |
| <i>Fatigue (n=1490, 265)</i>                 | 86 (1282)          | 80 (213)                           | 0.01    |
| Symptom duration (weeks, n=1424, 246)†       | 6.8 (10.5)         | 10.4 (32.2)                        | 0.004   |

1  
2 † median and IQRs for symptom duration were identical: 4 (2, 8); mean and SD is shown to  
3 clarify the direction of difference  
4 Sample sizes (n) are given for each variable if data collection was incomplete.  
5  
6

## 7 **Relationships between autoantibodies, diabetes presentation and individual** 8 **characteristics** 9

10 Children comprised 38% of the sub-group of 1,778 participants who provided a blood  
11 sample and the sub-group with blood samples was, accordingly, significantly older  
12 than the full cohort (21·6 (13·4, 32·8) vs 14·6 (10·4, 26·4) years,  $p < 0·0001$ ). Other  
13 parameters were similar.  
14

15 The relationship between positive autoantibody status and diabetes presentation was  
16 restricted to an increased prevalence of osmotic symptoms (97% versus 94%,  $p = 0·02$ ,  
17 Table 4). There was no significant difference in rates of ketoacidosis at presentation  
18 between autoantibody positive and negative participants (43% versus 40%,  $p = 0·3$ ,  
19 Table 4). The rate of autoantibody positivity was higher among children than adults,  
20 females versus males, and white Europeans versus people of non-white ethnicity (see  
21 above). Autoantibody positivity decreased progressively with age in adults (Figure 2).  
22 Of the individual autoantibodies, GADA were the most frequently observed in adults,  
23 with IA-2A and ZnT8A being relatively more common in children (Figure 2). The  
24 autoantibody positive adults were of lower BMI than autoantibody negative adults  
25 (BMI, median (IQR) 23·9 (21·4, 26·7) vs 25·5 (23·1, 29·2),  $p < 0·0001$ ), but no  
26 relationship to z-score was observed in children (Table 4). Autoantibody positivity was  
27 less prevalent amongst those who had a parent with diabetes.  
28  
29  
30  
31  
32  
33  
34  
35  
36  
37  
38  
39  
40  
41  
42  
43  
44  
45  
46  
47  
48  
49  
50  
51  
52  
53  
54  
55  
56  
57  
58  
59  
60

## DISCUSSION

For the first time, relationships between autoantibody status (measured centrally in a single reference laboratory) and phenotypic features in incident T1D are reported from a large, unselected, multi-ethnic population of both children and adults. The study was conducted with support from the NIHR CRN with most participants recruited from specialist centres. Based on estimates of T1D incidence and population demographics,<sup>21 22</sup> 20-25% of eligible incident cases in England and Wales were recruited.

Male predominance is unusual for an autoimmune condition but has been reported in adults with incident T1D.<sup>23</sup> In young children, the sex ratio has been reported to be close to unity.<sup>24</sup> In the present study the male excess was observed also in children, although the excess was less marked than in adults. Symptoms at presentation were as expected. Although weight loss was common, average body weight at the time of recruitment was normal, and many participants were overweight or obese, especially adults. An association between increased BMI and increased risk of progression from autoantibody positivity to development of diabetes in at-risk relatives has been reported previously.<sup>25</sup> Symptom duration was similar to that reported previously by others and was shorter in children than adults.<sup>26 27</sup> This may reflect parental vigilance of unwell children or a more insidious onset of clinical disease in older people.

The overall frequency of ketoacidosis at diagnosis (42%) was high, and slightly more so in adults than children. It occurred with similar frequency in white European and non-white ethnic groups. The figure of 42% is higher than in previous reports from the UK (23% in a recent national paediatric audit,<sup>28</sup> 26-27% in regional studies<sup>29 30</sup>) and a range of 13-80% in those aged <20 years has been reported internationally.<sup>31</sup> A very similar figure (40.3%) has been reported recently for children in Italy.<sup>32</sup> Ketoacidosis at

1 diagnosis is a quality issue as it reflects lack of awareness of diabetes features  
2 amongst professionals and the general population<sup>28</sup> and efforts to increase awareness  
3 lead to reductions in ketoacidosis at first presentation.<sup>33</sup> All methods of estimating the  
4 frequency of ketoacidosis at diagnosis have limitations, often leading to under-  
5 reporting.<sup>28</sup> Strengths of the current study include the large number of patients and the  
6 ability to confirm or refute the diagnosis where this was in doubt. A limitation is that  
7 ascertainment bias could be introduced because those who are the most ill at  
8 diagnosis may be the most likely to volunteer or to be referred. The higher  
9 ketoacidosis rate in adults versus children in our study appears at variance with the  
10 observation that ketoacidosis or severe ketoacidosis is more common in younger than  
11 in older children.<sup>29 32 34-36</sup> The current study did not include children <5 years of age,  
12 the group in childhood in whom ketoacidosis at diagnosis occurs most frequently<sup>37</sup>,  
13 and this may have contributed to the apparent children to adult difference. Of course, if  
14 such younger children had been included, this could have been increased the overall  
15 rate of ketoacidosis even higher. The lower rate associated with having a parent or a  
16 sibling with diabetes could result from a heightened awareness of symptoms leading to  
17 earlier clinical referral.<sup>31</sup> The absence of any significant ethnic influence on  
18 ketoacidosis is at variance with some previous reports where higher rates were  
19 observed in non-white sub-groups.<sup>38 39</sup>

20 One or more islet autoantibodies were observed in 85% of participants, more  
21 commonly in female than male and in younger compared with older participants. This  
22 is compatible with previous literature from the UK and other countries,<sup>40-42</sup> although  
23 assay differences make such comparisons difficult. The positivity rate is higher than  
24 reported in people with T1D of non-white ethnic origin,<sup>12 13</sup> albeit with the same  
25 caveats and bearing in mind that the previous studies of ethnic influences on antibody  
26

1 status have been limited in size or age range of population studied. The slight female  
2 autoantibody preponderance has been observed in other studies in young children, but  
3 not in older children and young adults.<sup>43</sup> The higher autoantibody frequency in those  
4 with a coexistent autoimmune disease reflects the clustering of autoimmune disorders  
5 observed in T1D and shared genetic susceptibility.<sup>44</sup> Overall, GADA were the  
6 antibodies most commonly present; while IA-2A and ZnT8A were seen most frequently  
7 in children, findings compatible with previous studies.<sup>43</sup> Insulin itself is considered a  
8 potential primary autoantigen as insulin autoantibodies are observed in incident T1D,  
9 especially in children<sup>26 27 45</sup>. In the current study, most participants had received insulin  
10 therapy for weeks before study entry and as they could have developed antibodies to  
11 the exogenous insulin, insulin autoantibodies were not measured. In prospective  
12 studies of infants at high genetic risk of T1D, insulin autoantibodies were often  
13 detected earlier than the other islet autoantibodies<sup>46 47</sup> and in consequence we may  
14 have underestimated the frequency of autoantibody positivity at diagnosis, especially  
15 in children.

16 Although autoantibodies can be present for years in people with diabetes who do not  
17 require insulin treatment immediately,<sup>48 49</sup> and are present in some diagnosed clinically  
18 with type 2 diabetes,<sup>50</sup> they are generally regarded as a biomarker for T1D. In  
19 prospective studies they precede and predict the onset of T1D.<sup>51</sup> They typically  
20 disappear, or titres drop to very low levels, in the years following diagnosis. In the  
21 autoantibody negative participants studied here, several explanations may be  
22 proposed. *First*, insulin autoantibodies were not measured. *Second*, autoantibodies to  
23 as yet unknown antigens may have been present.<sup>52</sup> The identification of tetraspanin-7  
24 as an autoantigen could, for example, account for some apparently antibody negative  
25 participants,<sup>53</sup> although recent data suggest this is unlikely to account for large

1 numbers.<sup>54</sup> *Third*, autoantibodies may have disappeared or their levels diminished, by  
2 the time of sampling. As all participants were recruited within six months of diagnosis,  
3 this is unlikely to be a major factor. *Fourth*, autoantibodies might develop  
4 subsequently, as reported previously for islet cell antibodies in a small proportion of  
5 patients.<sup>55</sup> *Fifth*, some people may have autoimmune T1D without a humoral  
6 response. *Finally*, people may actually have another diabetes sub-type. The  
7 autoantibody negative participants as a group tended to be older and, if adult, more  
8 overweight. These features are compatible with type 2 diabetes. They were more  
9 likely to have a parent with diabetes, typical of type 2 or monogenic diabetes. They  
10 were more likely to be of non-white ethnicity, more associated with type 2 diabetes.  
11 Those with ketoacidosis could have ketosis-prone diabetes (so-called idiopathic  
12 diabetes)<sup>56</sup> as this is difficult to distinguish from T1D at first presentation. Further  
13 studies and follow-up of the cohort are planned to explore the extent to which T1D  
14 without detectable autoantibodies describes a sub-group of T1D that is distinct from  
15 other diabetes sub-types.  
16  
17  
18  
19  
20  
21  
22  
23  
24  
25  
26  
27  
28  
29  
30  
31  
32  
33  
34  
35  
36  
37  
38  
39  
40  
41  
42  
43  
44  
45  
46  
47  
48  
49  
50  
51  
52  
53  
54  
55  
56  
57  
58  
59  
60



## ACKNOWLEDGEMENTS

We are grateful to Nish Chaturvedi and Joanne Holloway who provided much advice and support at the initiation of the project and to Simon Howell for chairing the Management Committee. We thank the ADDRESS-2 Patient Advocate Group for their input into aspects of study design and conduct. We also thank Kyla Chandler, Claire Williams and antibody laboratory technicians at the University of Bristol for the assay of islet autoantibodies, Flora Christofi for study administrative support at Imperial College London, and all the local research teams at participating centres. We are grateful to colleagues, George Alberti, Robert Elkeles, Rochan Agha-Jaffar, Ahmed El-Laboudi, Neil Hill, Monica Reddy and Shivshankar Seechurn for their critical review of early analyses of the results.

## FUNDING AND SPONSORSHIP

The National Institute for Health Research (NIHR) provided the funding for the research infra-structure of the national Clinical Research Network (CRN), with project-specific support from Diabetes UK (grant numbers 09/0003919 & 15/0005234) and the Juvenile Diabetes Research Foundation (grant numbers 9-2010-407 & 3-SRA-2015-36-A-N).

The funders were consulted about the vision for a UK-based type 1 diabetes ascertainment network. They had no involvement in study design, data collection, data analysis, data interpretation, or writing of the article, and took no part in the decision to submit for publication. The funders are represented on the management committee that oversees access to the data and stored biological samples. The funding was administered as a grant to Imperial College London. Imperial College London is the study Sponsor.

## DATA SHARING

The full anonymous dataset is available to access via a management committee, which includes people living with type 1 diabetes, scientists, clinicians and funder representatives as members.<sup>15</sup> Participants gave informed consent for data sharing subject to conditions described in the access procedure documents available from the study website: [www.address2.org](http://www.address2.org).

## COMPETING INTERESTS

All authors have completed the ICMJE uniform disclosure form at [www.icmje.org/coi\\_disclosure.pdf](http://www.icmje.org/coi_disclosure.pdf) and declare: funding from Diabetes UK and the Juvenile Diabetes Research Foundation administered as grants to Imperial College London for the submitted work; no financial relationships with any organisations that might have an interest in the submitted work in the previous three years; no other relationships or activities that could appear to have influenced the submitted work.

## CONTRIBUTORSHIP

### Author contributions

Literature searches were carried out by authors VB, HCW, IFG, NSO and DGJ. Authors AK, HCW, IFG, AJKW, PJB, DBD and DGJ were involved in the study design. Data collection was coordinated by authors AK and HCW. Authors AK, HCW and IFG were responsible for data management. Authors AJKW and PJB were responsible for autoantibody measurements. The statistical analysis plan was developed by IFG. Analysis of the data was by authors VB, AK and IFG. Data were interpreted by all authors (VB, AK, HCW, IFG, SM, PJB, AJKW, DBD, CMD, MP, NSO and DGJ). The manuscript was prepared by authors VB, AK, HCW, IFG, AJKW and DGJ. Critical revisions were made by authors PJB, DBD, CMD, MP and NSO. Figures were prepared by authors AK, HCW and IFG.

1 The Management Committee oversaw access to the data and stored biological  
2 samples. The Patient Advocate Group had input into aspects of study conduct. Local  
3 investigators were responsible for the recruitment of participants and collection of  
4 data.  
5  
6  
7  
8  
9

## 10 **GUARANTORSHIP**

11 Dr Walkey accepts full responsibility for the finished article and confirms that she had  
12 full access to all the data in the study and was responsible for the decision to submit  
13 for publication. Dr Walkey affirms that the manuscript is an honest, accurate, and  
14 transparent account of the study being reported; that no important aspects of the study  
15 have been omitted; and that any discrepancies from the study as planned have been  
16 explained.  
17  
18  
19  
20  
21  
22  
23  
24  
25  
26  
27  
28  
29  
30  
31  
32  
33  
34  
35  
36  
37  
38  
39  
40  
41  
42  
43  
44  
45  
46  
47  
48  
49  
50  
51  
52  
53  
54  
55  
56  
57  
58  
59  
60

## REFERENCES

1. Todd J. Etiology of type 1 diabetes. *Immunity* 2010;32:457-67.
2. Wenzlau JM, Juhl K, Yu L, et al. The cation efflux transporter ZnT8 (Slc30A8) is a major autoantigen in human type 1 diabetes. *Proc Natl Acad Sci U S A* 2007;104(43):17040-5.
3. Tridgell DM, Spiekerman C, Wang RS, et al. Interaction of onset and duration of diabetes on the percent of GAD and IA-2 antibody-positive subjects in the type 1 diabetes genetics consortium database. *Diabetes care* 2011;34(4):988-93.
4. Palmer J, Asplin C, Clemon sP, et al. Insulin antibodies in insulin-dependent diabetics before insulin treatment. *Science* 1983;222:1337-9.
5. Bonifacio E, Genovese S, Braghi S, et al. Islet autoantibody markers in IDDM: risk assessment strategies yielding high sensitivity. *Diabetologia* 1995;38:816-22.
6. Graham J, Hagopian W, Kockum I, et al. Genetic effects on age-dependent onset and islet cell autoantibody markers in type 1 diabetes. *Diabetes* 2002;51:1346-55.
7. Chiang J, Kirkman S, Laffel L, et al. Type 1 Diabetes Through the Life Span: A Position Statement of the American Diabetes Association. *Diabetes Care* 2014;37:2034-54.
8. National Institute for Health and Care Excellence. Type 1 diabetes in adults: diagnosis and management. NICE guideline, 2015.
9. National Institute for Health and Care Excellence. Diabetes (type 1 and type 2) in children and young people: diagnosis and management. NICE guideline, 2015.
10. Hameed S, Ellard S, Woodhead HJ, et al. Persistently autoantibody negative (PAN) type 1 diabetes mellitus in children. *Pediatr Diabetes* 2011;12(3 Pt 1):142-9.
11. Knip M, Korhonen S, Kulmala P, et al. Prediction of type 1 diabetes in the general population. *Diabetes care* 2010;33(6):1206-12.
12. Libman IM, Pietropaolo M, Arslanian SA, et al. Evidence for heterogeneous pathogenesis of insulin-treated diabetes in black and white children. *Diabetes Care* 2003;26(10):2876-82.
13. Dabelea D, Pihoker C, Talton JW, et al. Etiological approach to characterization of diabetes type: the SEARCH for Diabetes in Youth Study. *Diabetes care* 2011;34(7):1628-33.
14. Wenzlau JM, Frisch LM, Hutton JC, et al. Changes in Zinc Transporter 8 Autoantibodies Following Type 1 Diabetes Onset: The Type 1 Diabetes Genetics Consortium Autoantibody Workshop. *Diabetes Care* 2015;38 Suppl 2:S14-20.

- 1  
2  
3  
4  
5  
6  
7  
8  
9  
10  
11  
12  
13  
14  
15  
16  
17  
18  
19  
20  
21  
22  
23  
24  
25  
26  
27  
28  
29  
30  
31  
32  
33  
34  
35  
36  
37  
38  
39  
40  
41  
42  
43  
44  
45  
46  
47  
48  
49  
50  
51  
52  
53  
54  
55  
56  
57  
58  
59  
60
15. Walkey HC, Kaur, A., Bravis, V., Godsland, I.F., Misra, S., Williams, A.J.K., Bingley, P.J., Dunger, D.B., Oliver, N., Johnston, D.G. Rationale and protocol for the After Diabetes Diagnosis REsearch Support System (ADDRESS): an incident and high risk type 1 diabetes UK cohort study. *BMJ Open* 2017;7:e013956.
16. Bonifacio E, Yu L, Williams AK, et al. Harmonization of glutamic acid decarboxylase and islet antigen-2 autoantibody assays for National Institute of Diabetes and Digestive and Kidney Diseases Consortia. *J Clin Endocrinol Metab* 2010;95(7):3360-7.
17. Long AE, Gooneratne AT, Rokni S, et al. The role of autoantibodies to zinc transporter 8 in prediction of type 1 diabetes in relatives: lessons from the European Nicotinamide Diabetes Intervention Trial (ENDIT) cohort. *J Clin Endocrinol Metab* 2012;97(2):632-7.
18. de Onis M, Onyango AW, Borghi E, et al. Development of a WHO growth reference for school-aged children and adolescents. *Bulletin of the World Health Organization* 2007;85:660-7.
19. de Onis M, Lobstein T. Defining obesity risk status in the general childhood population: which cut-offs should we use? *Int J Pediatr Obes* 2010;5(6):458-60.
20. WHO. Physical status: the use and interpretation of anthropometry. Report of a WHO expert Committee. WHO Technical Report Series. Geneva: World Health Organisation, 1995.
21. Patterson CC, Dahlquist GG, Gyürüs E, et al. Incidence trends for childhood type 1 diabetes in Europe during 1989-2003 and predicted new cases 2005-20: a multicentre prospective registration study. *Lancet* 2009;373:2027-33.
22. Office for National Statistics. 2011 Census: Aggregate data (England and Wales) [computer file]. UK Data Service Census Support (This information is licensed under the terms of the Open Government Licence <http://www.nationalarchives.gov.uk/doc/open-government-licence/version/2>) 2011 [Available from: <http://infuse.ukdataservice.ac.uk> accessed 11 July 2016].
23. Diaz-Valencia P, Bougnères P, Valleron A-J. Global epidemiology of type 1 diabetes in young adults and adults: a systematic review. *BMC Public Health* 2015;15:255-70.
24. Soltesz G, Patterson C, Dahlquist G. Worldwide childhood type 1 diabetes incidence—what can we learn from epidemiology? *Pediatr Diabetes* 2007;8 Suppl 6:6-14.
25. Ferrara CT, Geyer SM, Liu YF, et al. Excess BMI in Childhood: A Modifiable Risk Factor for Type 1 Diabetes Development? *Diabetes Care* 2017;40(5):698-701.
26. Karjalainen J, Salmela P, Ilonen J, et al. A comparison of childhood and adult type I diabetes mellitus. *N Engl J Med* 1989;320:881-6.

- 1 27. Sabbah E, Savola K, Ebeling T, et al. Genetic, autoimmune, and clinical  
2 characteristics of childhood- and adult-onset type 1 diabetes. *Diabetes care*  
3 2000;23(9):1326-32.  
4
- 5 28. National Paediatric Diabetes Audit. National Diabetes Paediatric Audit 2012-2015  
6 Report 2: hospital admissions and complications: Royal College of Paediatrics  
7 and Child Health, 2017.  
8
- 9 29. Pinkney JH, Bingley PJ, Sawtell PA, et al. Presentation and progress of childhood  
10 diabetes mellitus: a prospective population-based study. The Bart's-Oxford  
11 Study Group. *Diabetologia* 1994;37(1):70-4.  
12
- 13 30. Alvi NS, Davies P, Kirk JM, et al. Diabetic ketoacidosis in Asian children. *Arch Dis*  
14 *Child* 2001;85:60-1.  
15
- 16 31. Usher-Smith JA, Thompson M, Ercole A, et al. Variation between countries in the  
17 frequency of diabetic ketoacidosis at first presentation of type 1 diabetes in  
18 children: a systematic review. *Diabetologia* 2012;55(11):2878-94.  
19
- 20 32. Cherubini V, Skrami E, Ferrito L, et al. High frequency of diabetic ketoacidosis at  
21 diagnosis of type 1 diabetes in Italian children: a nationwide longitudinal study,  
22 2004-2013. *Sci Rep* 2016;6:38844.  
23
- 24 33. Vanelli M, Chiari G, Lacava S, et al. Campaign for diabetic ketoacidosis prevention  
25 still effective 8 years later. *Diabetes Care* 2007;30(4):e12.  
26
- 27 34. Levy-Marchal C, Patterson CC, Green A, et al. Geographical variation of  
28 presentation at diagnosis of type I diabetes in children: the EURODIAB study.  
29 European and Diabetes. *Diabetologia* 2001;44 Suppl 3:B75-80.  
30
- 31 35. Rewers A, Klingensmith G, Davis C, et al. Presence of diabetic ketoacidosis at  
32 diagnosis of diabetes mellitus in youth: the Search for Diabetes in Youth Study.  
33 *Pediatrics* 2008;121(5):e1258-66.  
34
- 35 36. Lokulo-Sodipe K, Moon RJ, Edge JA, et al. Identifying targets to reduce the  
36 incidence of diabetic ketoacidosis at diagnosis of type 1 diabetes in the UK.  
37 *Arch Dis Child* 2014;99(5):438-42.  
38
- 39 37. National Paediatric Diabetes Audit Project Board. National Diabetes Paediatric  
40 Audit Report 2011-12: Part 2 hospital admissions and complications: Royal  
41 College of Paediatrics and Child Health, 2014.  
42
- 43 38. Sundaram PC, Day E, Kirk JM. Delayed diagnosis in type 1 diabetes mellitus. *Arch*  
44 *Dis Child* 2009;94(2):151-2.  
45
- 46 39. Usher-Smith JA, Thompson MJ, Sharp SJ, et al. Factors associated with the  
47 presence of diabetic ketoacidosis at diagnosis of diabetes in children and  
48 young adults: a systematic review. *BMJ* 2011;343:d4092.  
49
- 50 40. Gorus FK, Goubert P, Semakula C, et al. IA-2-autoantibodies complement  
51 GAD65-autoantibodies in new-onset IDDM patients and help predict impending  
52 diabetes in their siblings. The Belgian Diabetes Registry. *Diabetologia*  
53 1997;40(1):95-9.  
54  
55  
56  
57

- 1 41. Long AE, Gillespie KM, Rokni S, et al. Rising incidence of type 1 diabetes is  
2 associated with altered immunophenotype at diagnosis. *Diabetes*  
3 2012;61(3):683-6.  
4
- 5 42. Perchard R, MacDonald D, Say J, et al. Islet autoantibody status in a multi-ethnic  
6 UK clinic cohort of children presenting with diabetes. *Arch Dis Child*  
7 2015;100:348-52.  
8
- 9 43. Pihoker C, Gilliam LK, Hampe CS, et al. Autoantibodies in diabetes. *Diabetes*  
10 2005;54 Suppl 2:S52-61.  
11
- 12 44. Kawasaki E, Takino H, Yano M, et al. Autoantibodies to glutamic acid  
13 decarboxylase in patients with IDDM and autoimmune thyroid disease.  
14 *Diabetes* 1994;43:80-86.  
15
- 16 45. Bosi E, Boulware DC, Becker DJ, et al. Impact of Age and Antibody Type on  
17 Progression From Single to Multiple Autoantibodies in Type 1 Diabetes  
18 Relatives. *J Clin Endocrinol Metab* 2017;102(8):2881-86.  
19
- 20 46. Parikka V, Nanto-Salonen K, Saarinen M, et al. Early seroconversion and rapidly  
21 increasing autoantibody concentrations predict prepubertal manifestation of  
22 type 1 diabetes in children at genetic risk. *Diabetologia* 2012;55(7):1926-36.  
23
- 24 47. Ziegler AG, Bonifacio E, Group B-BS. Age-related islet autoantibody incidence in  
25 offspring of patients with type 1 diabetes. *Diabetologia* 2012;55(7):1937-43.  
26
- 27 48. Naik RG, Palmer JP. Latent autoimmune diabetes in adults (LADA). *Rev Endocr*  
28 *Metab Disord* 2003;4:233-41.  
29
- 30 49. Maruyama T, Nakagawa T, Kasuga A, et al. Heterogeneity among patients with  
31 latent Autoimmune diabetes in adults. *Diabetes Metab Res Rev* 2011;27:971-  
32 74.  
33
- 34 50. Palmer JP, Hampe CS, Chiu H, et al. Is latent autoimmune diabetes in adults  
35 distinct from type 1 diabetes or just type 1 diabetes at an older age? *Diabetes*  
36 2005;54:62-67.  
37
- 38 51. Williams AJK, Bingley PJ. Worth the wait: type 1 diabetes prospective birth cohort  
39 studies enter adolescence. *Diabetologia* 2012;55:1873-6.  
40
- 41 52. Pietropaolo M, Towns R, Eisenbarth GS. Humoral autoimmunity in type 1  
42 diabetes: prediction, significance, and detection of distinct disease subtypes.  
43 *Cold Spring Harb Perspect Med* 2012;2:a012831.  
44
- 45 53. McLaughlin KA, Richardson CC, Ravishankar A, et al. Identification of  
46 Tetraspanin-7 as a Target of Autoantibodies in Type 1 Diabetes. *Diabetes*  
47 2016;65(6):1690-8.  
48
- 49 54. Walther D, Eugster A, Jergens S, et al. Tetraspanin 7 autoantibodies in type 1  
50 diabetes. *Diabetologia* 2016;59(9):1973-6.  
51  
52  
53  
54  
55  
56  
57

- 1  
2  
3  
4  
5  
6  
7  
8  
9
55. Borg H, Gottsater A, Fernlund P, et al. A 12-year prospective study of the relationship between islet antibodies and beta-cell function at and after the diagnosis in patients with adult-onset diabetes. *Diabetes* 2002;51(6):1754-62.
56. American Diabetes Association. Standards of Medical Care in Diabetes-2016 Abridged for Primary Care Providers. *Clin Diabetes* 2016;34(1):3-21.

10  
11

### Figure captions

12  
13

#### Figure 1. Individual characteristics as predictors of diabetes presentation and autoantibody status.

14  
15  
16  
17  
18  
19  
20  
21  
22

Univariate logistic regression odds ratios or linear regression coefficients (circles), 95% CIs (horizontal lines)<sup>#</sup> and statistical significances are shown. Red circles signify that a significant univariate relationship was sustained on multivariable analysis with all individual characteristics included as predictor variables (participants with complete data: n=2911-3312) and in the sub-group with antibodies measured (participants with complete data including antibody status: n=1610-1778)

23  
24

**Footnotes:** <sup>#</sup> for 'Age' 95% CIs did not extend beyond the odds ratio circles

25  
26

\* not significant in sub-group with antibodies measured on multivariable analysis

27  
28

\*\* significant in sub-group with antibodies measured on multivariable analysis

29  
30

† not significant on multivariable analysis

31  
32

†† significant on multivariable analysis

33  
34

§ coefficient derived from square-root-transformed data

35  
36  
37  
38  
39  
40  
41  
42  
43  
44  
45  
46  
47  
48  
49  
50  
51  
52  
53  
54  
55  
56  
57  
58  
59  
60

#### Figure 2. The percentage of participants exhibiting islet autoantibodies (any and individual) autoantibody in relation to age at diagnosis.



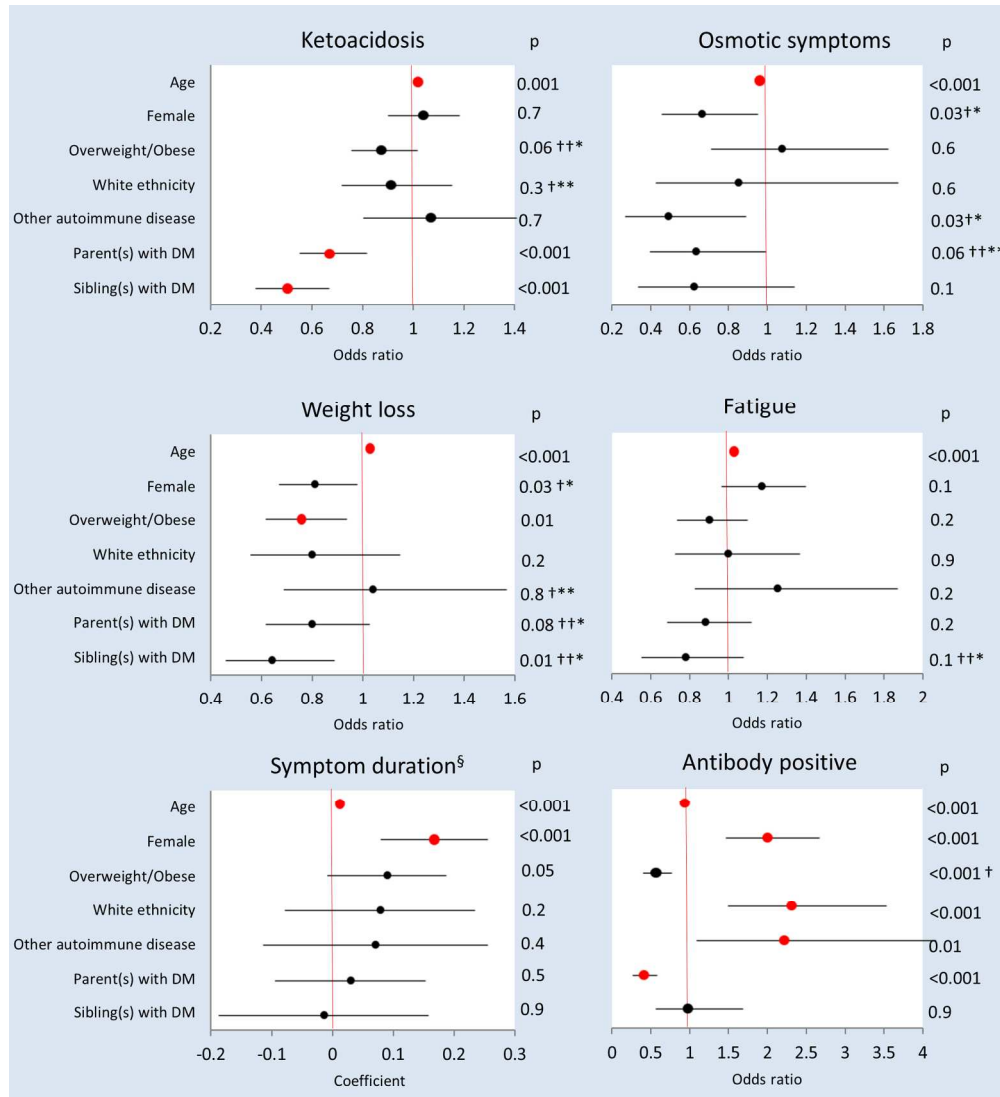

Figure 1. Individual characteristics as predictors of diabetes presentation and autoantibody status.

171x187mm (300 x 300 DPI)

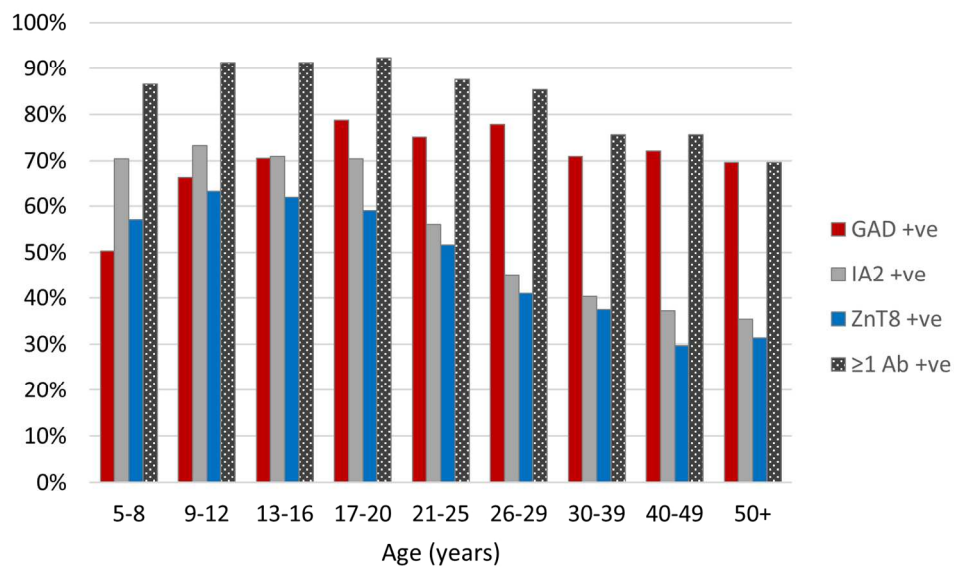

Figure 2. The percentage of participants exhibiting islet autoantibodies (any and individual) autoantibody in relation to age at diagnosis.

141x90mm (300 x 300 DPI)

# BMJ Open Rationale and protocol for the After Diabetes Diagnosis REsearch Support System (ADDRESS): an incident and high risk type 1 diabetes UK cohort study

Helen C Walkey,<sup>1</sup> Akaal Kaur,<sup>1</sup> Vassiliki Bravis,<sup>1</sup> Ian F Godsland,<sup>1</sup> Shivani Misra,<sup>1</sup> Alistair J K Williams,<sup>2</sup> Polly J Bingley,<sup>2</sup> David B Dunger,<sup>3</sup> Nick Oliver,<sup>1</sup> Desmond G Johnston<sup>1</sup>

**To cite:** Walkey HC, Kaur A, Bravis V, *et al*. Rationale and protocol for the After Diabetes Diagnosis REsearch Support System (ADDRESS): an incident and high risk type 1 diabetes UK cohort study. *BMJ Open* 2017;**7**:e013956. doi:10.1136/bmjopen-2016-013956

► Prepublication history for this paper is available online. To view these files please visit the journal online (<http://dx.doi.org/10.1136/bmjopen-2016-013956>).

Received 19 August 2016  
Revised 24 April 2017  
Accepted 6 June 2017

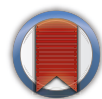

CrossMark

<sup>1</sup>Department of Medicine, Imperial College London, London, UK

<sup>2</sup>School of Clinical Sciences, University of Bristol, Bristol, UK

<sup>3</sup>Department of Paediatrics, University of Cambridge, Cambridge, UK

## Correspondence to

Dr. Helen C Walkey; [h.walkey@imperial.ac.uk](mailto:h.walkey@imperial.ac.uk)

## ABSTRACT

**Introduction** Type 1 diabetes is heterogeneous in its presentation and progression. Variations in clinical presentation between children and adults, and with ethnic group warrant further study in the UK to improve understanding of this heterogeneity. Early interventions to limit beta cell damage in type 1 diabetes are undergoing evaluation, but recruitment is challenging. The protocol presented describes recruitment of people with clinician-assigned, new-onset type 1 diabetes to understand the variation in their manner of clinical presentation, to facilitate recruitment into intervention studies and to create an open-access resource of data and biological samples for future type 1 diabetes research.

**Methods and analysis** Using the National Institute for Health Research Clinical Research Network, patients >5 years of age diagnosed clinically with type 1 diabetes (and their siblings) are recruited within 6 months of diagnosis. Participants agree to have their clinical, laboratory and demographic data stored on a secure database, for their clinical progress to be monitored using information held by NHS Digital, and to be contacted about additional research, in particular immunotherapy and other interventions. An optional blood sample is taken for islet autoantibody measurement and storage of blood and DNA for future analyses. Data will be analysed statistically to describe the presentation of incident type 1 diabetes in a contemporary UK population.

**Ethics and dissemination** Ethical approval was obtained from the independent NHS Research Ethics Service. Results will be presented at national and international meetings and submitted for publication to peer-reviewed journals.

## INTRODUCTION

Type 1 diabetes (T1D) is the most common form of diabetes in childhood, but it is frequently diagnosed in adults.<sup>1</sup> In the UK it is most common in people of white European descent, but also affects other ethnic groups,<sup>2</sup> and it is heterogeneous in initial

## Strengths and limitations of this study

- Children and adults (including older adults) are characterised soon after disease onset.
- There is wide geographical spread of ascertainment.
- The study allows differences in presentation of type 1 diabetes to be assessed by ethnic group.
- There is no attempt to capture information on all incident cases.
- Assessment of C-peptide and genetic risk markers is desirable in the characterisation of new-onset type 1 diabetes, but beyond the scope of this protocol. However, the After Diabetes Diagnosis REsearch Support System resource will enable precisely such future studies.

clinical presentation and in its progression.<sup>3</sup> Markers of autoimmunity, such as antibodies to islet antigens, most commonly glutamate decarboxylase (GADA), insulin itself, islet antigen 2 (IA-2A) and zinc transporter-T8 (ZnT-8A), are frequently, but not always detectable at onset in people with a clinical diagnosis of T1D.<sup>4-6</sup> Measurement of autoantibodies is advocated by many to aid diabetes classification,<sup>3 7-9</sup> but only recommended in the UK when knowledge of autoantibody status (positive/negative) would have implications for clinical management or access to treatment (eg, 'insulin pump' therapy).<sup>10</sup> Few T1D cohorts include both children and adults and, where studied, clinical characteristics and autoantibody frequencies have been found to vary between children and adults at onset.<sup>11-15</sup> Additionally, descriptions of adult-onset diabetes with autoantibodies have highlighted differences in T1D phenotype at onset between adults and children.<sup>16 17</sup> Reports of the variation of autoantibody status

and frequency with ethnicity are also scarce and have revealed a somewhat conflicting picture.<sup>6 18–20</sup> Differences in presenting features of T1D with autoantibody status warrant further investigation in children and adults in the multiethnic UK population to improve understanding of the heterogeneity of T1D. People with T1D have a life-long dependency on treatment with exogenous insulin, resulting from an autoimmune destruction of pancreatic beta cells. Early intervention therapies are emerging that aim to limit this autoimmune destruction and preserve beta cell function.<sup>21 22</sup> Preservation of even modest levels of insulin secretion has been shown to reduce the risk of developing diabetic complications, improve glycaemic control and may also protect against severe hypoglycaemia.<sup>23 24</sup> Many investigational therapies target new-onset T1D — at a stage when there is still significant insulin secretion to preserve. Recruitment to trials in new-onset T1D is challenging, in part because individual centres see a relatively small number of incident cases per year. The aims of the After Diabetes Diagnosis REsearch Support System (ADDRESS) are therefore the following:

1. to characterise people with clinician-assigned, new-onset T1D, demographically, clinically and by islet autoantibody status, in a national, multiethnic cohort, and to perform hypothesis-generating analyses investigating the heterogeneity of clinical presentation
2. to use the cohort of children and adults with incident T1D and their siblings to support recruitment into T1D trials and other clinical research studies by providing them with information about studies for which they might be eligible (initially in new-onset T1D, and with time, studies in established T1D, or studies for first-degree relatives), thereby also increasing awareness of opportunities to participate in research among patients and their families
3. to establish an open-access resource of data and biological samples, including DNA, collected close to diagnosis for use in other T1D research, forming, in particular, a foundation for prospective studies from the time of diagnosis.

There are a number of ongoing initiatives in the USA and Europe to characterise people with incident T1D, some of which include the banking of biological samples and open access to samples or data, some that include the study of first-degree relatives, and some that also support the conduct of clinical trials. Exemplar initiatives are summarised in [table 1](#), in comparison with ADDRESS. There are T1D registries in the UK primarily set up to drive improvements in clinical care, and the notable open-access Warren repository,<sup>25</sup> established to further understanding of T1D genetic susceptibility. There are, however, no national, multiethnic collections of data and biological samples from both children and adults with incident T1D in the UK. The Scottish Health Research register SHARE is an example of another national resource that supports recruitment to clinical research, although unlike ADDRESS it does not focus on new-onset

T1D.<sup>26</sup> The features of these UK-specific T1D registries and resources are summarised in [table 2](#).

In 2006 the National Institute for Health Research Clinical Research Network (NIHR CRN) was set up as the research delivery arm of the National Health Service (NHS) in England. The universal health coverage of the NHS, coupled with the NIHR CRN, makes the UK a particularly suitable environment for studies in new-onset T1D. This is further strengthened via linkage with the ADDRESS new-onset T1D ascertainment network, which is dedicated to identifying people with incident T1D shortly after diagnosis and offering them and their siblings entry into T1D clinical research studies. ADDRESS is a partner in the T1DUK Consortium, formed in 2015 to promote, support and develop immunotherapy research in the UK via a network of centres to conduct clinical trials, and a mechanistic core to conduct state-of-the-art assays to study the immunology of T1D and the mechanisms of action of immunotherapies.

## METHODS AND ANALYSIS

### Establishment of the cohort

The After Diabetes Diagnosis REsearch Support System (previously referred to as ADDRESS or ADDRESS-2, hereafter as ADDRESS) started in pilot form in 2008 to establish the ‘proof of concept’ that ascertainment and recruitment of people with incident T1D shortly after diagnosis were feasible in substantial numbers using the resources of the NIHR CRN. Patients with a clinician-assigned diagnosis of T1D were recruited if they agreed to have their data on a database and to be contacted about other research projects for which they might be eligible. Clinical and demographic information, including the participant’s unique NHS identifier, was obtained for analysis, but no biological samples were collected. This pilot was established in 78 recruiting hospitals in England and Wales. NIHR CRN staff recruited 645 participants between 2008 and 2010. With cofunding from Diabetes UK and the Juvenile Diabetes Research Foundation, and with separate NHS Research Ethics Committee review, the project was expanded to its present and ongoing form in January 2011 in which 156 hospitals are participating in 124 NHS Trusts across England and Health Boards in Wales. [Figure 1](#) illustrates the timeline of development of ADDRESS, and [figure 2](#) shows the locations of centres participating currently. The NIHR CRN structure provides research support via 15 local branches in England and a related system exists to support diabetes research in Wales.

### Inclusion and exclusion criteria

During the first 3 years of the current study (2011–2014), people with a clinician-assigned diagnosis of T1D aged 5–60 years were recruited within 6 months of diagnosis. From October 2014 the upper age limit was removed to allow newly diagnosed adults over the age of 60 to participate. People initially diagnosed with another diabetes

**Table 1** Exemplar initiatives to characterise incident T1D, in comparison with ADDRESS

| Title                                            | Country | Geographical coverage                                                    | Diabetes subtypes | Relatives of proband   |                                | Recruitment age (years)                                  | Multiethnic | Biological sample collection | Accessible data or biological samples | Consent to be approached about other research | Year initiated | Aims                                                                                                                                                                                        |
|--------------------------------------------------|---------|--------------------------------------------------------------------------|-------------------|------------------------|--------------------------------|----------------------------------------------------------|-------------|------------------------------|---------------------------------------|-----------------------------------------------|----------------|---------------------------------------------------------------------------------------------------------------------------------------------------------------------------------------------|
|                                                  |         |                                                                          |                   | Diabetes subtypes      | age (years)                    |                                                          |             |                              |                                       |                                               |                |                                                                                                                                                                                             |
| SEARCH for Diabetes in Youth Study <sup>32</sup> | USA     | Five regional centres                                                    | All               | No                     | <20                            | Yes                                                      | Yes         | Yes                          | Unknown                               | Unknown                                       | 2000           | To determine temporal changes in incidence and prevalence of diabetes in young people by subtype, age, gender and ethnicity, and to aid classification of subtype                           |
| T1D Exchange registry <sup>33</sup>              | USA     | 77 centres in 35 states                                                  | T1D               | No                     | Children and adults of any age | Yes                                                      | Yes         | Yes                          | Yes                                   | Yes (75% of cohort)                           | 2010           | To identify issues of clinical relevance, generate hypotheses and characterise patients for future studies                                                                                  |
| Belgian Diabetes Registry <sup>34</sup>          | Belgium | Belgium-wide with national network of centres to conduct clinical trials | T1D               | First-degree relatives | <40                            | Unknown                                                  | Yes         | Yes                          | Unknown                               | Yes                                           | 1989           | To detect trends in incidence over time, to identify markers of T1D onset and progression, and to conduct trials                                                                            |
| BOX <sup>35</sup>                                | UK      | Six centres in the former Oxford Regional Health Authority area          | T1D               | First-degree relatives | ≤21                            | Unknown (there is little ethnic diversity in the region) | Yes         | Yes                          | No                                    | Yes                                           | 1985           | To study the natural history of T1D, including initiation and progression of islet autoimmunity to identify those at risk of developing T1D, and to determine temporal changes in incidence |
| ADDRESS                                          | UK      | 156 centres across England and Wales                                     | T1D               | Siblings               | ≥5                             | Yes                                                      | Yes         | Yes                          | Yes                                   | Yes                                           | 2007           | To study the heterogeneity of clinical presentation, to support recruitment into clinical trials and other studies, and to facilitate genetic and biomarker research                        |

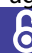**Table 2** UK-specific type 1 diabetes (T1D) registries and open-access resources

| Title                                                                                                                                   | Type of collection                                                                                       | Diabetes subtypes                                                                             | Relatives of proband age (years)                                                                                                              | Recruitment age (years) | Incident/prevalent     | Multithnic              | Biological sample collection                     | Accessible data or biological samples | Consent to be approached about other research |
|-----------------------------------------------------------------------------------------------------------------------------------------|----------------------------------------------------------------------------------------------------------|-----------------------------------------------------------------------------------------------|-----------------------------------------------------------------------------------------------------------------------------------------------|-------------------------|------------------------|-------------------------|--------------------------------------------------|---------------------------------------|-----------------------------------------------|
| Type 1 diabetes Warren repository <sup>25</sup>                                                                                         | DNA and cell lines (collected during 1990–1995)                                                          | T1D                                                                                           | Multiplex families (two affected children): at least one diagnosed <17 years of age and other(s) diagnosed <29 years, with two living parents | Children and adults     | Prevalent              | No: white European only | Yes (DNA)                                        | Yes                                   | Unknown                                       |
| National Children and Young People's Diabetes Network, <a href="http://www.cypdiabetesnetwork.nhs.uk">www.cypdiabetesnetwork.nhs.uk</a> | National register in Wales <sup>66</sup> and regional registries in England <sup>67</sup>                | All                                                                                           | No                                                                                                                                            | <19                     | Incident and prevalent | Yes                     | No                                               | No                                    | No                                            |
| The Scottish Care Information – Diabetes Collaboration, <a href="http://www.sci-diabetes.scot.nhs.uk">www.sci-diabetes.scot.nhs.uk</a>  | Register and shared electronic patient record                                                            | All                                                                                           | No                                                                                                                                            | Children and adults     | Incident and prevalent | Yes                     | No                                               | No                                    | Unknown                                       |
| The Scottish Health Research register SHARE <sup>26</sup>                                                                               | Register of people living in Scotland who have declared their interest in taking part in health research | All (supports recruitment to research across all clinical specialties, not diabetes-specific) | Unknown                                                                                                                                       | >16                     | Unknown                | Yes                     | Storage of remainder of routine clinical samples | Unknown                               | Yes                                           |

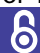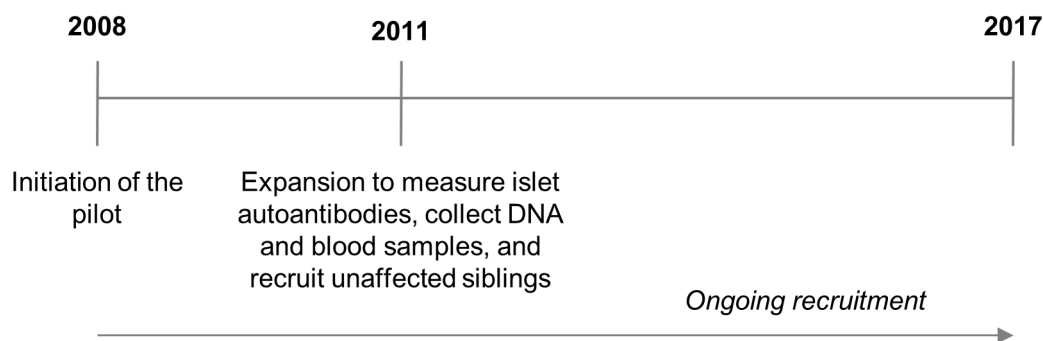

**Figure 1** Study timeline.

subtype and later reassigned a diagnosis of T1D are eligible if still within 6 months of the initial diagnosis. Adults who are not competent to give consent are excluded. People who took part in the pilot form of ADDRESS are eligible to be recruited to the current study, and their individual data are transferred from the pilot into the current study.

### Sample size

The annual incidence of T1D in the UK is 22–30 per 100 000 in the 0–14 years age group, with an estimated 76% of incident cases aged 5–14 years<sup>27</sup>. There is a paucity of incidence data for adults worldwide, but one UK study reported an incidence of 12 per 100 000 for those aged 15–34 years.<sup>28</sup> Therefore, we estimate that 3900–4500 children and adults will be diagnosed per year in the current recruitment age range in England and Wales.

### Recruitment

Methods vary depending on local resources and preferences, but local researchers (NIHR CRN research nurses and/or other local research nurses and physicians) perform the recruitment mainly via secondary care and specialist diabetes centres, as patients (both children and adults) are mostly seen clinically in these settings. Recruiting staff in the NIHR CRN have been trained to approach patients and families with sensitivity soon after diagnosis and to take informed consent. Permission is sought from the patient or parent/guardian to approach siblings. The patients, their siblings and the parent/guardian for children aged 5–15 years are provided with age-specific information sheets about the study by the local researcher. Informed consent is sought at least 1 week after diagnosis and at least 48 hours after the information sheets have been given. Recruitment support initiatives have included providing NHS clinical care teams with information about T1D research, displaying posters about ADDRESS and providing patients with leaflets introducing clinical research and ADDRESS in clinic and in packs for newly diagnosed patients. A website provides additional information.

### Consent

ADDRESS operates a two-tier consent model: for tier 1, participants provide written informed consent for their

health and contact details to be held on a database and for their being contacted about studies. They also consent to follow-up using information held by NHS Digital and the Office for National Statistics (ONS). With additional second-tier consent, participants may choose to donate blood samples for islet autoantibody analysis and storage of blood and DNA for future use in diabetes research.

### Data collection

At the time of recruitment participant information is collected via interview with the participant or parent/guardian, and from specialist care medical records, as shown in table 3. Ethnicity is self-reported as one of 16 categories, following UK ONS guidance on collecting ethnic group data. A diagnosis of parental or grandparental diabetes is recorded without subtype because historical classifications may be incorrect or incomplete.<sup>29</sup> Laboratory test results are recorded from those tests performed locally as part of routine clinical care. A diagnosis of ketoacidosis at presentation is recorded if assigned by the local clinical team, or if all of the following were documented in the clinical records: glucose >11 mmol/L; blood ketone bodies >3 mmol/L or urine ketones levels positive ++; pH <7.3; and/or bicarbonate <15 mmol/L. Except for the additional specialist care information available for patients, similar data are collected at baseline for siblings.

### Project-specific blood sampling

Sample donation is a voluntary component of ADDRESS, currently for participants with T1D only (prior to October 2014, siblings were also given the option of donating samples). Random blood samples are collected and sent at ambient temperature via standard post to the Public Health England European Collection of Cell Cultures at Porton Down, UK, which operates in accordance with the UK Human Tissue Act 2004. Serum (from a serum separation tube) and peripheral blood lymphocytes (PBLs, from an acid citrate dextrose tube) are separated on arrival. An EDTA tube is frozen for later DNA extraction (median: 2 (IQR: 1–3) days after sampling). The samples are stored in coded, pseudoanonymised format and include serum from coagulated blood, extracted and

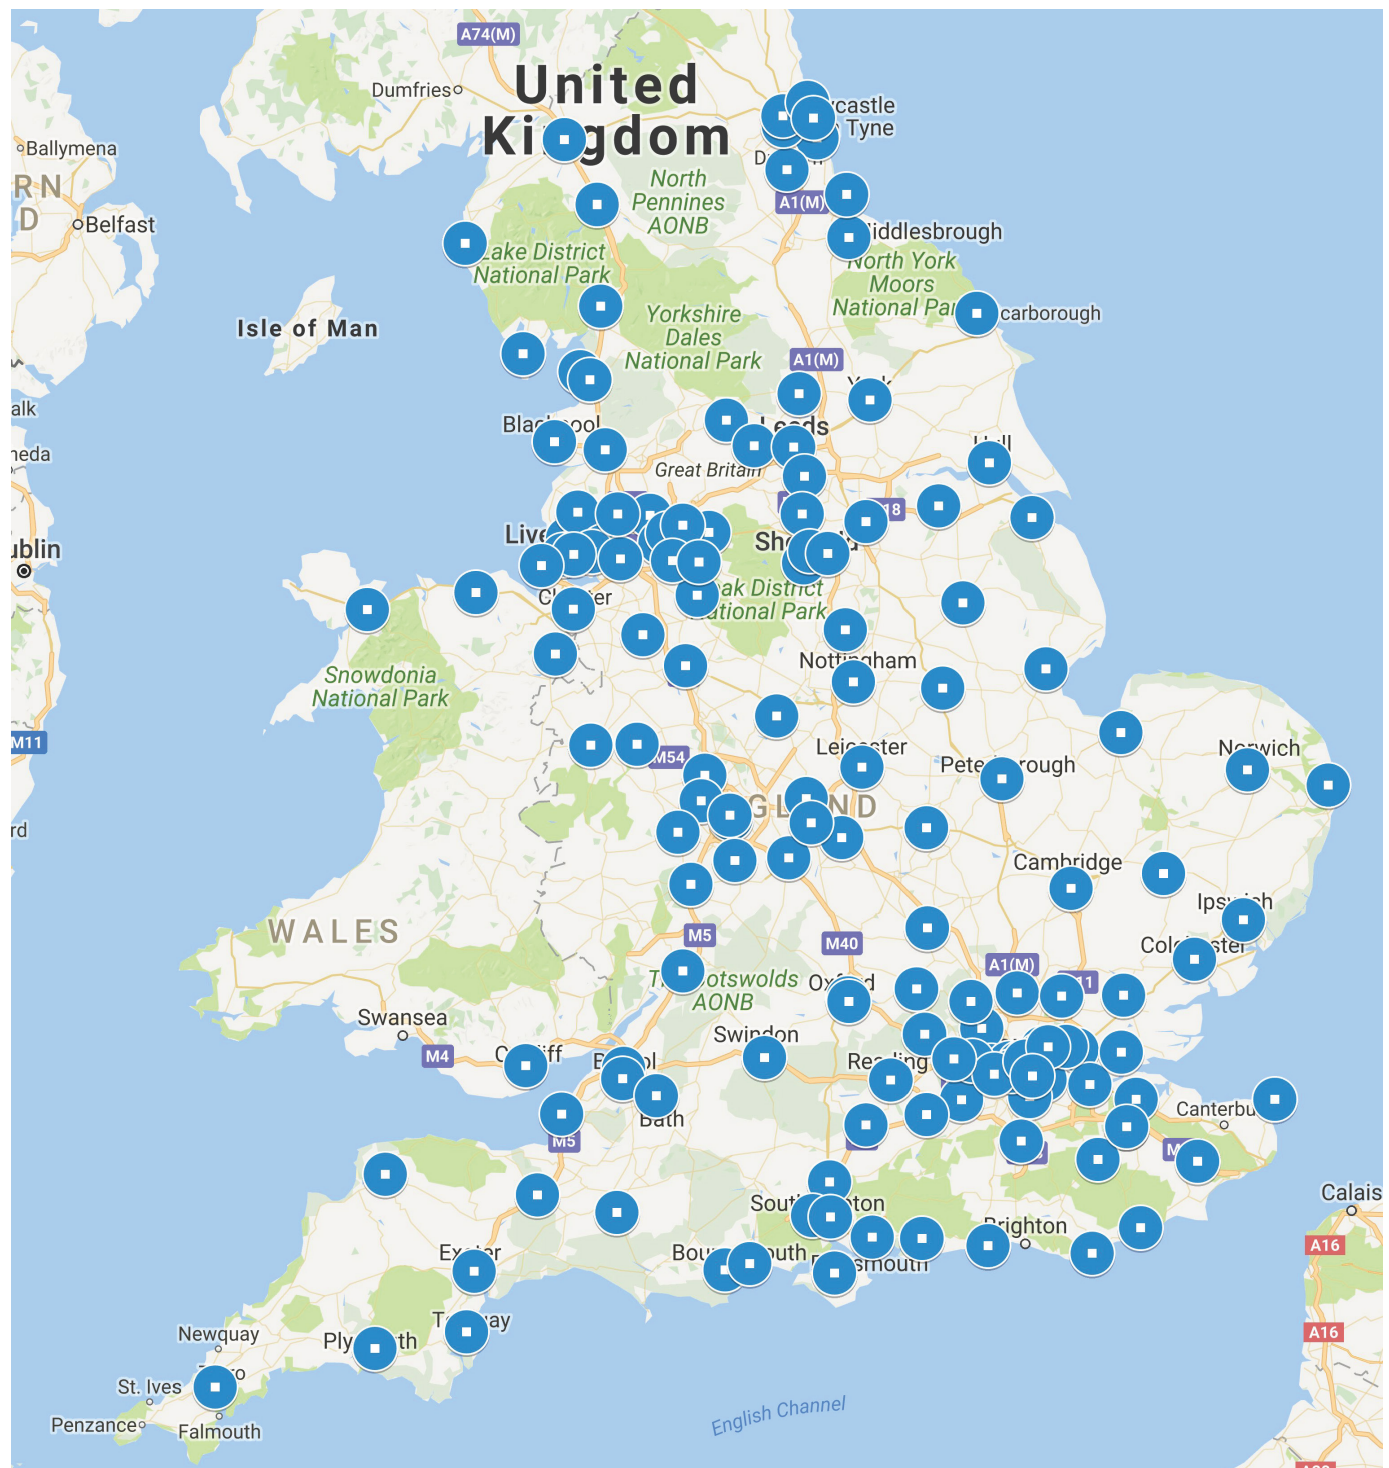

**Figure 2** Map with circles showing the locations of the 156 recruiting centres in 124 English NHS Trusts and Welsh Health Boards (an estimated 84% of the total number that provide acute care services). Numbers of centres recruiting from both paediatric and adult clinics, the paediatric clinic only, and the adult clinic only are 80, 32 and 44, respectively.

resuspended DNA, PBLs, and lymphoblastoid cell lines (LCLs) derived by Epstein-Barr virus transformation of thawed PBLs. Samples are stored at  $-80^{\circ}\text{C}$  and PBLs and LCLs are placed in liquid nitrogen for cryopreservation for the duration of the study. An aliquot (0.5 mL) of serum from each blood sample is sent to the University of Bristol for autoantibody measurements.

### Islet autoantibody measurement

Autoantibodies to GADA, IA-2A and ZnT-8A are measured in participants with T1D using established radiobinding assays.<sup>30 31</sup> Insulin autoantibodies are not measured as these people are receiving exogenous insulin therapy, which could itself induce an immune response.



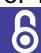**Table 3** Data and associated methods of collection for participants with incident T1D and for sibling participants at the time of recruitment

| Data                                                                                                                                                                                                                                  | Incident T1D              |                                          | Sibling                   |
|---------------------------------------------------------------------------------------------------------------------------------------------------------------------------------------------------------------------------------------|---------------------------|------------------------------------------|---------------------------|
|                                                                                                                                                                                                                                       | Via interview or at visit | Via or validated against medical records | Via interview or at visit |
| Contact details and unique NHS identifier                                                                                                                                                                                             | X                         |                                          | X                         |
| General practitioner (GP) details (GP is informed of the person's participation)                                                                                                                                                      | X                         |                                          | X                         |
| Diabetes care physician details (physician is informed of the person's participation if not the principal investigator at the research site)                                                                                          | X                         | X                                        |                           |
| Demographic information including self-reported ethnic origin                                                                                                                                                                         | X                         |                                          | X                         |
| Date of diagnosis, clinical presentation and duration of symptoms (presentation with diabetic ketoacidosis, polyuria/polydipsia, weight loss, fatigue, abdominal pain,* fasting or random plasma glucose)                             | X                         | X                                        |                           |
| Current diabetes treatment regimen, including date insulin first administered                                                                                                                                                         | X                         | X                                        |                           |
| Non-diabetic medication                                                                                                                                                                                                               | X                         | X                                        | X                         |
| Medical history including history of autoimmune diseases (Addison's disease, coeliac disease, hyperthyroidism, hypothyroidism and vitiligo) and of gestational diabetes                                                               | X                         | X                                        | X                         |
| Family medical history including parental and grandparental history of diabetes, hypertension, myocardial infarction and stroke, along with sibling demographics and diabetes history                                                 | X                         |                                          | X                         |
| Clinical measures, including blood pressure, weight and height using standard protocols                                                                                                                                               | X                         |                                          | X                         |
| Blood biochemistry including glycated haemoglobin (HbA1c) (mmol/mol), fasting or random plasma glucose (mmol/L), oral glucose tolerance test results (mmol/L) if performed locally and C-peptide levels (nmol/L) if performed locally |                           | X                                        |                           |
| Details of diabetes structured education offered/scheduled/completed*                                                                                                                                                                 | X                         | X                                        |                           |

\*Collected for participants recruited from February 2015 onwards.  
T1D, type 1 diabetes; NHS, National Health Service.

Antigens radiolabelled with  $^{35}\text{S}$  methionine are expressed using a TNT in vitro reticulocyte lysate quick coupled transcription/translation system kit (Promega, Madison, Wisconsin, USA) with plasmids encoding full-length GAD65, the intracytoplasmic region of IA-2 (aa 606–979), and the 325-arginine (ZnT8R) and 325-tryptophan (ZnT8W) isoforms of the C-terminal region of ZnT8 (aa268-379). Immunocomplexes formed following incubation of sera with radiolabelled antigens are precipitated with Protein A-Sepharose (GE Healthcare Life Sciences, Little Chalfont, Bucks, UK), washed and counted in a TopCount beta counter (PerkinElmer, Waltham, Massachusetts, USA).

Results are expressed in digestive and kidney (DK) units/mL (GADA and IA-2A) or arbitrary units (ZnT8A) after reference to standard curves consisting of dilutions of patient sera in antibody-negative sera from healthy donors. Thresholds are set at the 97th percentile of 974 control samples for GADA, the 98th percentile of 500 control samples for IA-2A and the 97.5th percentile of 523 healthy schoolchildren for ZnT8A. The GADA assay achieves a sensitivity of 74% at 96.7% specificity, while the

IA-2A, ZnT8RA and ZnT8WA assays achieve sensitivities of 72%, 60% and 46%, respectively, at 100% specificity, in the 2015 Islet Autoantibody Standardization Program Workshop. Interassay coefficients of variation of high and moderate/low positive samples, respectively, were 18% and 18% for GADA, 19% and 17% for IA-2A, 22% and 16% for ZnT8RA, and 25% and 20% for ZnT8WA.

#### Follow-up data collection and verification

Participants with T1D are reviewed via their medical records at 4–8 months following diagnosis to verify that their original clinical diabetes classification has not been changed by their clinicians. Data reviewed at the follow-up are shown in [table 4](#).

An application to NHS Digital and the UK ONS is planned for tracing change of postal address, mortality flagging and access to hospital admission data (Hospital Episode Statistics).

#### Database

Data are entered into a secure electronic data capture and management system designed specifically for clinical

**Table 4** Data collection for participants with incident T1D at 4–8 months postdiagnosis and at least 2 months after the time of recruitment

| Data                                                                                                                                                                                                                                  | Incident T1D        |
|---------------------------------------------------------------------------------------------------------------------------------------------------------------------------------------------------------------------------------------|---------------------|
|                                                                                                                                                                                                                                       | Via medical records |
| Confirmation of, or change in classification of, diabetes subtype                                                                                                                                                                     | X                   |
| Occurrence of diabetic ketoacidosis since diagnosis*                                                                                                                                                                                  | X                   |
| Any change in diabetes treatment or dose, and concurrent medication                                                                                                                                                                   | X                   |
| Clinical measures, including blood pressure, weight and height                                                                                                                                                                        | X                   |
| Blood biochemistry including glycated haemoglobin (HbA1c) (mmol/mol), fasting or random plasma glucose (mmol/L), oral glucose tolerance test results (mmol/L) if performed locally and C-peptide levels (nmol/L) if performed locally | X                   |
| Details of diabetes structured education offered/scheduled/completed*                                                                                                                                                                 | X                   |

All data are collected from medical records.

\*Collected for participants recruited from February 2015 onwards. T1D, type 1 diabetes.

research. All information is stored in accordance with the UK Data Protection Act (1998).

### Recruitment into other studies

Eligible participants are given information at intervals about specific diabetes trials/research studies by the central study team or local researchers. Information is retained on those previously contacted about research and whether or not they are currently participating in a study.

### Data analysis plan

The collected data allow generation and testing of hypotheses about the presentation of clinician-assigned T1D and other characteristics early after diagnosis. Our aim is to compare characteristics between groups: for example, islet autoantibody positive and negative; ethnicity groupings of white European, South Asian (including Indian, Pakistani and Bangladeshi) and African-Caribbean (black African or black Caribbean); and children and adults. We aim also to investigate the relationships between insulin dose and glycaemic control. Recorded variables are categorised as 'Individual Characteristics' (eg, age, gender, child/adult, birth weight, ethnicity, history of other autoimmune disease, parent with diabetes, sibling with diabetes), 'Diabetes Presentation' (eg, ketoacidosis at T1D presentation, osmotic symptoms (polydipsia/polyuria), weight loss, fatigue, symptom duration, initial insulin dose and autoantibody status) and 'Diabetes Characteristics' (eg, insulin dose, glycated haemoglobin (HbA1c) at time points after presentation).

### ETHICS AND DISSEMINATION

Ethical approval was obtained from the NHS Research Ethics Committee - South Central-Berkshire (reference 10/H0505/85), and each participating NHS Trust submitted a Site-Specific Assessment in order to participate. The project is conducted in accordance with the recommendations for physicians involved in research on human subjects by the 18th World Medical Assembly, Helsinki 1964 and later revisions. The International Conference on Harmonisation Guideline for Good Clinical Practice (Topic E6 — 10 June 1996) and participant confidentiality are maintained throughout.

ADDRESS is an accessible resource for clinical and academic researchers, both as an infrastructure to identify and contact candidates for recruitment into T1D studies and as an open-access database and biological sample repository. Access is through a management committee comprised of lay people, scientists and clinical investigators representing relevant T1D research interests. Researchers wishing to use the ADDRESS-2 resource can apply to the ADDRESS-2 Management Committee. The access process and associated documents are described on the study website ([www.address2.org](http://www.address2.org)).

Ethical approval will be sought for continuing use of the data every 5 years (current approval is to the end of 2019). Every effort will be made to sustain this open-access resource beyond the present funding term. The database will be maintained by Imperial College London. The biological samples will continue to be stored for as long as there is funding to support the repository.

The results arising from this project will be presented at national and international meetings, and submitted for publication to peer-reviewed medical journals.

**Acknowledgements** The authors would like to thank Professor Nish Chaturvedi, now at University College London, and Dr Bob Goldstein at the Juvenile Diabetes Research Foundation for their input and advice.

**Contributors** The vision for an ascertainment network was that of DGJ in consultation with funders. Recruitment, data collection and analysis were designed and refined by DGJ, HCW, NO, VB, AK, SM and DBD. Islet autoantibody analysis was designed by PJB and AJKW. The statistical analysis plan was written by IFG. Procedures for open access were drafted by HCW and ratified by the ADDRESS-2 Management Committee.

**Funding** This work was supported by Diabetes UK grant number 09/0003919 and the Juvenile Diabetes Research Foundation grant number 9-2010-407. Recruitment is supported by staff at the National Institute for Health Research Clinical Research Network.

**Competing interests** None declared.

**Ethics approval** NHS Research Ethics Committee (South Central-Berkshire).

**Provenance and peer review** Not commissioned; externally peer reviewed.

**Open Access** This is an Open Access article distributed in accordance with the Creative Commons Attribution Non Commercial (CC BY-NC 4.0) license, which permits others to distribute, remix, adapt, build upon this work non-commercially, and license their derivative works on different terms, provided the original work is properly cited and the use is non-commercial. See: <http://creativecommons.org/licenses/by-nc/4.0/>

© Article author(s) (or their employer(s) unless otherwise stated in the text of the article) 2017. All rights reserved. No commercial use is permitted unless otherwise expressly granted.

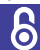

## REFERENCES

1. Diaz-Valencia PA, Bougnères P, Valleron AJ. Global epidemiology of type 1 diabetes in young adults and adults: a systematic review. *BMC Public Health* 2015;15:255.
2. Audit NPD. *National Paediatric Diabetes Audit 2015-16 Report 1: care processes and outcomes*: Royal College of Paediatrics and Child Health, 2017.
3. Chiang JL, Kirkman MS, Laffel LM, *et al*. Type 1 diabetes through the life span: a position statement of the American Diabetes Association. *Diabetes Care* 2014;37:2034–54.
4. Wenzlau JM, Juhl K, Yu L, *et al*. The cation efflux transporter ZnT8 (Slc30A8) is a Major autoantigen in human type 1 diabetes. *Proc Natl Acad Sci U S A* 2007;104:17040–5.
5. Hameed S, Ellard S, Woodhead HJ, *et al*. Persistently autoantibody negative (PAN) type 1 diabetes mellitus in children. *Pediatr Diabetes* 2011;12(3 Pt 1):142–9.
6. Perchard R, MacDonald D, Say J, *et al*. Islet autoantibody status in a multi-ethnic UK clinic cohort of children presenting with diabetes. *Arch Dis Child* 2015;100:348–52.
7. Hamman RF, Bell RA, Dabelea D, *et al*. The SEARCH for Diabetes in Youth study: rationale, findings, and future directions. *Diabetes Care* 2014;37:3336–44.
8. Tuomi T, Santoro N, Caprio S, *et al*. The many faces of diabetes: a disease with increasing heterogeneity. *Lancet* 2014;383:1084–94.
9. Leslie RD, Palmer J, Schloot NC, *et al*. Diabetes at the crossroads: relevance of disease classification to pathophysiology and treatment. *Diabetologia* 2016;59:13–20.
10. National Institute for Health and Care Excellence. *Type 1 diabetes in adults: diagnosis and management: NICE Guideline*, 2015.
11. Karjalainen J, Salmela P, Ilonen J, *et al*. A comparison of childhood and adult type 1 diabetes mellitus. *N Engl J Med* 1989;320:881–6.
12. Lohmann T, Sessler J, Verloren HJ, *et al*. Distinct genetic and immunological features in patients with onset of IDDM before and after age 40. *Diabetes Care* 1997;20:524–9.
13. Vandewalle CL, Falorni A, Lernmark A, *et al*. Associations of GAD65- and IA-2- autoantibodies with genetic risk markers in new-onset IDDM patients and their siblings. the Belgian Diabetes Registry. *Diabetes Care* 1997;20:1547–52.
14. Pozzilli P, Visalli N, Buzzetti R, *et al*. Metabolic and immune parameters at clinical onset of insulin-dependent diabetes: a population-based study. IMDIAB Study Group. immunotherapy Diabetes. *Metabolism* 1998;47:1205–10.
15. Sabbah E, Savola K, Ebeling T, *et al*. Genetic, autoimmune, and clinical characteristics of childhood- and adult-onset type 1 diabetes. *Diabetes Care* 2000;23:1326–32.
16. Hawa MI, Kolb H, Schloot N, *et al*. Adult-onset autoimmune diabetes in Europe is prevalent with a broad clinical phenotype: action LADA 7. *Diabetes Care* 2013;36:908–13.
17. Merger SR, Leslie RD, Boehm BO. The broad clinical phenotype of type 1 diabetes at presentation. *Diabet Med* 2013;30:170–8.
18. Wenzlau JM, Frisch LM, Hutton JC, *et al*. Changes in Zinc Transporter 8 Autoantibodies following type 1 Diabetes Onset: the type 1 Diabetes Genetics Consortium Autoantibody Workshop. *Diabetes Care* 2015;38(Suppl 2):S14–S20.
19. Stoupa A, Dorchy H. HLA-DQ genotypes - but not immune markers - differ by ethnicity in patients with childhood onset type 1 diabetes residing in Belgium. *Pediatr Diabetes* 2016;17:342–50.
20. Ong YH, Koh WCA, Ng ML, *et al*. Glutamic acid decarboxylase and islet antigen 2 antibody profiles in people with adult-onset diabetes mellitus: a comparison between mixed ethnic populations in Singapore and Germany. *Diabet Med* 2017.
21. Lernmark A, Larsson HE. Immune therapy in type 1 diabetes mellitus. *Nat Rev Endocrinol* 2013;9:92–103.
22. von Herrath M, Peakman M, Roep B. Progress in immune-based therapies for type 1 diabetes. *Clin Exp Immunol* 2013;172:186–202.
23. Steffes MW, Sibley S, Jackson M, *et al*. Beta-cell function and the development of diabetes-related complications in the diabetes control and complications trial. *Diabetes Care* 2003;26:832–6.
24. Kuhlreiter WM, Washer SL, Hsu E, *et al*. Low levels of C-peptide have clinical significance for established type 1 diabetes. *Diabet Med* 2015;32:1346–53.
25. Bain SC, Todd JA, Barnett AH. The British Diabetic Association--Warren Repository. *Autoimmunity* 1990;7:83–5.
26. McKinstry B, Sullivan FM, Vasishta S, *et al*. Cohort profile: the Scottish Research register SHARE. A register of people interested in research participation linked to NHS data sets. *BMJ Open* 2017;7:e013351.
27. Patterson CC, Dahlquist GG, Gyürüs E, *et al*. Incidence trends for childhood type 1 diabetes in Europe during 1989–2003 and predicted new cases 2005–20: a multicentre prospective registration study. *Lancet* 2009;373:2027–33.
28. Imkamp AK, Gulliford MC. Trends in type 1 diabetes incidence in the UK in 0- to 14-year-olds and in 15- to 34-year-olds, 1991–2008. *Diabet Med* 2011;28:811–4.
29. Stone MA, Camosso-Stefinovic J, Wilkinson J, *et al*. Incorrect and incomplete coding and classification of diabetes: a systematic review. *Diabet Med* 2010;27:491–7.
30. Bonifacio E, Yu L, Williams AK, *et al*. Harmonization of glutamic acid decarboxylase and islet antigen-2 autoantibody assays for national institute of diabetes and digestive and kidney diseases consortia. *J Clin Endocrinol Metab* 2010;95:3360–7.
31. Long AE, Gooneratne AT, Rokni S, *et al*. The role of autoantibodies to zinc transporter 8 in prediction of type 1 diabetes in relatives: lessons from the European Nicotinamide Diabetes intervention trial (ENDIT) cohort. *J Clin Endocrinol Metab* 2012;97:632–7.
32. SEARCH Study Group. SEARCH for Diabetes in Youth: a multicenter study of the prevalence, incidence and classification of diabetes mellitus in youth. *Control Clin Trials* 2004;25:458–71.
33. Beck RW, Tamborlane WV, Bergenstal RM, *et al*. The T1D Exchange clinic registry. *J Clin Endocrinol Metab* 2012;97:4383–9.
34. Gorus FK, Anselmo J, Keymeulen B. Type 1 (insulin-dependent) diabetes mellitus: an autoimmune, predictable and preventable disease? Lessons from national registries and new challenges to clinical biology. *Acta Clin Belg* 1993;48:96–108.
35. Bingley PJ, Gale EA. Incidence of insulin dependent diabetes in England: a study in the Oxford region, 1985–6. *BMJ* 1989;298:558–60.
36. O'Hagan M, Harvey JN, Brecon G; Brecon Group. Glycemic control in children with type 1 diabetes in Wales: influence of the pediatric diabetes specialist nurse. *Diabetes Care* 2010;33:1724–6.
37. Staines A, Bodansky HJ, Lilley HE, *et al*. The epidemiology of diabetes mellitus in the United Kingdom: the Yorkshire Regional Childhood Diabetes Register. *Diabetologia* 1993;36:1282–7.

BMJ Open

# Rationale and protocol for the After Diabetes Diagnosis REsearch Support System (ADDRESS): an incident and high risk type 1 diabetes UK cohort study

Helen C Walkey, Akaal Kaur, Vassiliki Bravis, Ian F Godsland, Shivani Misra, Alistair J K Williams, Polly J Bingley, David B Dunger, Nick Oliver and Desmond G Johnston

BMJ Open 2017 7:  
doi: 10.1136/bmjopen-2016-013956

---

Updated information and services can be found at:  
<http://bmjopen.bmj.com/content/7/7/e013956>

---

*These include:*

## References

This article cites 34 articles, 13 of which you can access for free at:  
<http://bmjopen.bmj.com/content/7/7/e013956#BIBL>

## Open Access

This is an Open Access article distributed in accordance with the Creative Commons Attribution Non Commercial (CC BY-NC 4.0) license, which permits others to distribute, remix, adapt, build upon this work non-commercially, and license their derivative works on different terms, provided the original work is properly cited and the use is non-commercial. See: <http://creativecommons.org/licenses/by-nc/4.0/>

## Email alerting service

Receive free email alerts when new articles cite this article. Sign up in the box at the top right corner of the online article.

---

## Topic Collections

Articles on similar topics can be found in the following collections  
[Diabetes and Endocrinology \(392\)](#)

---

## Notes

---

To request permissions go to:  
<http://group.bmj.com/group/rights-licensing/permissions>

To order reprints go to:  
<http://journals.bmj.com/cgi/reprintform>

To subscribe to BMJ go to:  
<http://group.bmj.com/subscribe/>

STROBE Statement—Checklist of items that should be included in reports of *cohort studies*

|                           | Item No | Recommendation                                                                                                                                                                       | Page                                                                  |
|---------------------------|---------|--------------------------------------------------------------------------------------------------------------------------------------------------------------------------------------|-----------------------------------------------------------------------|
| <b>Title and abstract</b> | 1       | (a) Indicate the study's design with a commonly used term in the title or the abstract                                                                                               | 1                                                                     |
|                           |         | (b) Provide in the abstract an informative and balanced summary of what was done and what was found                                                                                  | 4-5                                                                   |
| <b>Introduction</b>       |         |                                                                                                                                                                                      |                                                                       |
| Background/rationale      | 2       | Explain the scientific background and rationale for the investigation being reported                                                                                                 | 7                                                                     |
| Objectives                | 3       | State specific objectives, including any prespecified hypotheses                                                                                                                     | 7                                                                     |
| <b>Methods</b>            |         |                                                                                                                                                                                      |                                                                       |
| Study design              | 4       | Present key elements of study design early in the paper                                                                                                                              | 8-9 & protocol paper (BMJ Open 2017;7:e013956)                        |
| Setting                   | 5       | Describe the setting, locations, and relevant dates, including periods of recruitment, exposure, follow-up, and data collection                                                      | 8-6, 11 & protocol paper (BMJ Open 2017;7:e013956)                    |
| Participants              | 6       | (a) Give the eligibility criteria, and the sources and methods of selection of participants. Describe methods of follow-up                                                           | 8 & protocol paper (BMJ Open 2017;7:e013956)                          |
|                           |         | (b) For matched studies, give matching criteria and number of exposed and unexposed                                                                                                  | N/A                                                                   |
| Variables                 | 7       | Clearly define all outcomes, exposures, predictors, potential confounders, and effect modifiers. Give diagnostic criteria, if applicable                                             | 8-9 & protocol paper (BMJ Open 2017;7:e013956)                        |
| Data sources/measurement  | 8*      | For each variable of interest, give sources of data and details of methods of assessment (measurement). Describe comparability of assessment methods if there is more than one group | 8-9 & protocol paper (BMJ Open 2017;7:e013956)                        |
| Bias                      | 9       | Describe any efforts to address potential sources of bias                                                                                                                            | 20                                                                    |
| Study size                | 10      | Explain how the study size was arrived at                                                                                                                                            | 8, 11, 19 & protocol paper (BMJ Open 2017;7:e013956) (ongoing cohort) |
| Quantitative variables    | 11      | Explain how quantitative variables were handled in the analyses. If applicable, describe which groupings were chosen and why                                                         | 8-9                                                                   |
| Statistical methods       | 12      | (a) Describe all statistical methods, including those used to control for confounding                                                                                                | 8-9                                                                   |
|                           |         | (b) Describe any methods used to examine subgroups and interactions                                                                                                                  | 8-9, 14 (ethnic groups) 18 (autoantibody subgroup)                    |
|                           |         | (c) Explain how missing data were addressed                                                                                                                                          | 11, Tables 1-4 (12-13, 16-18) & Figure 1                              |
|                           |         | (d) If applicable, explain how loss to follow-up was addressed                                                                                                                       | N/A                                                                   |
|                           |         | (e) Describe any sensitivity analyses                                                                                                                                                | N/A                                                                   |

| <b>Results</b>           |     |                                                                                                                                                                                                              |                                                                         |
|--------------------------|-----|--------------------------------------------------------------------------------------------------------------------------------------------------------------------------------------------------------------|-------------------------------------------------------------------------|
| Participants             | 13* | (a) Report numbers of individuals at each stage of study—eg numbers potentially eligible, examined for eligibility, confirmed eligible, included in the study, completing follow-up, and analysed            | 8, 19 & protocol paper (BMJ Open 2017;7:e013956)                        |
|                          |     | (b) Give reasons for non-participation at each stage                                                                                                                                                         | 8 & protocol paper (BMJ Open 2017;7:e013956)                            |
|                          |     | (c) Consider use of a flow diagram                                                                                                                                                                           | Not complex: diagnosed and recruited or not, blood sample given or not. |
| Descriptive data         | 14* | (a) Give characteristics of study participants (eg demographic, clinical, social) and information on exposures and potential confounders                                                                     | 11 & Table 1 (12)                                                       |
|                          |     | (b) Indicate number of participants with missing data for each variable of interest                                                                                                                          | 11, Tables 1-4 (12-13, 16-18) & Figure 1                                |
|                          |     | (c) Summarise follow-up time (eg, average and total amount)                                                                                                                                                  | N/A data from recruitment only                                          |
| Outcome data             | 15* | Report numbers of outcome events or summary measures over time                                                                                                                                               | N/A                                                                     |
| Main results             | 16  | (a) Give unadjusted estimates and, if applicable, confounder-adjusted estimates and their precision (eg, 95% confidence interval). Make clear which confounders were adjusted for and why they were included | 11-18, Tables 1-4 (12-13, 16-18) & Figure 1                             |
|                          |     | (b) Report category boundaries when continuous variables were categorized                                                                                                                                    | 9 & Figure 2                                                            |
|                          |     | (c) If relevant, consider translating estimates of relative risk into absolute risk for a meaningful time period                                                                                             | N/A                                                                     |
| Other analyses           | 17  | Report other analyses done—eg analyses of subgroups and interactions, and sensitivity analyses                                                                                                               | 18 (autoantibody subgroup)                                              |
| <b>Discussion</b>        |     |                                                                                                                                                                                                              |                                                                         |
| Key results              | 18  | Summarise key results with reference to study objectives                                                                                                                                                     | 19-22                                                                   |
| Limitations              | 19  | Discuss limitations of the study, taking into account sources of potential bias or imprecision. Discuss both direction and magnitude of any potential bias                                                   | 19-22                                                                   |
| Interpretation           | 20  | Give a cautious overall interpretation of results considering objectives, limitations, multiplicity of analyses, results from similar studies, and other relevant evidence                                   | 19-22                                                                   |
| Generalisability         | 21  | Discuss the generalisability (external validity) of the study results                                                                                                                                        | 6, 22                                                                   |
| <b>Other information</b> |     |                                                                                                                                                                                                              |                                                                         |
| Funding                  | 22  | Give the source of funding and the role of the funders for the present study and, if applicable, for the original study on which the present article is based                                                | 23                                                                      |

\*Give information separately for exposed and unexposed groups.

1  
2 **Note:** An Explanation and Elaboration article discusses each checklist item and gives methodological background and  
3 published examples of transparent reporting. The STROBE checklist is best used in conjunction with this article (freely  
4 available on the Web sites of PLoS Medicine at <http://www.plosmedicine.org/>, Annals of Internal Medicine at  
5 <http://www.annals.org/>, and Epidemiology at <http://www.epidem.com/>). Information on the STROBE Initiative is  
6 available at <http://www.strobe-statement.org>.  
7  
8  
9  
10  
11  
12  
13  
14  
15  
16  
17  
18  
19  
20  
21  
22  
23  
24  
25  
26  
27  
28  
29  
30  
31  
32  
33  
34  
35  
36  
37  
38  
39  
40  
41  
42  
43  
44  
45  
46  
47  
48  
49  
50  
51  
52  
53  
54  
55  
56  
57  
58  
59  
60

# BMJ Open

## The relationship between islet autoantibody status and the clinical characteristics of children and adults with incident type 1 diabetes in a UK cohort

|                                 |                                                                                                                                                                                                                                                                                                                                                                                                                                                                                                                                                                                                                                                                                                                                                 |
|---------------------------------|-------------------------------------------------------------------------------------------------------------------------------------------------------------------------------------------------------------------------------------------------------------------------------------------------------------------------------------------------------------------------------------------------------------------------------------------------------------------------------------------------------------------------------------------------------------------------------------------------------------------------------------------------------------------------------------------------------------------------------------------------|
| Journal:                        | <i>BMJ Open</i>                                                                                                                                                                                                                                                                                                                                                                                                                                                                                                                                                                                                                                                                                                                                 |
| Manuscript ID                   | bmjopen-2017-020904.R1                                                                                                                                                                                                                                                                                                                                                                                                                                                                                                                                                                                                                                                                                                                          |
| Article Type:                   | Research                                                                                                                                                                                                                                                                                                                                                                                                                                                                                                                                                                                                                                                                                                                                        |
| Date Submitted by the Author:   | 07-Feb-2018                                                                                                                                                                                                                                                                                                                                                                                                                                                                                                                                                                                                                                                                                                                                     |
| Complete List of Authors:       | Bravis, Vassiliki; Imperial College London, Medicine<br>Kaur, Akaal; Imperial College London, Medicine<br>Walkey, Helen; Imperial College London, Medicine<br>Godsland, Ian; Imperial College London, Endocrinology and Metabolic Medicine<br>Misra, Shivani; Imperial College London, Medicine<br>Bingley, Polly; University of Bristol, School of Clinical Sciences<br>Williams, Alistair; University of Bristol, School of Clinical Sciences<br>Dunger, David; University of Cambridge, Paediatrics<br>Dayan, Colin; Cardiff University School of Medicine<br>Peakman, Mark; King's College London, Department of Immunobiology<br>Oliver, Nick; Imperial College, Endocrinology and Diabetes<br>Johnston, Desmond; Imperial College London, |
| <b>Primary Subject Heading</b>: | Diabetes and endocrinology                                                                                                                                                                                                                                                                                                                                                                                                                                                                                                                                                                                                                                                                                                                      |
| Secondary Subject Heading:      | Epidemiology                                                                                                                                                                                                                                                                                                                                                                                                                                                                                                                                                                                                                                                                                                                                    |
| Keywords:                       | General diabetes < DIABETES & ENDOCRINOLOGY, EPIDEMIOLOGY, IMMUNOLOGY, Paediatric endocrinology < PAEDIATRICS, DIABETES & ENDOCRINOLOGY                                                                                                                                                                                                                                                                                                                                                                                                                                                                                                                                                                                                         |
|                                 |                                                                                                                                                                                                                                                                                                                                                                                                                                                                                                                                                                                                                                                                                                                                                 |

SCHOLARONE™  
Manuscripts



1 **TITLE: The relationship between islet autoantibody status and the clinical**  
2 **characteristics of children and adults with incident type 1 diabetes in a UK**  
3 **cohort**  
4  
5  
6  
7  
8  
9  
10

11 **CORRESPONDING AUTHOR:** Dr Helen C Walkey, Department of Medicine, Imperial  
12 College London, G3, Medical School, Norfolk Place, London, W2 1PG, UK. Email:  
13 [h.walkey@imperial.ac.uk](mailto:h.walkey@imperial.ac.uk); telephone: +44(0)20 7594 1316.  
14  
15  
16  
17  
18  
19  
20

21 **AUTHORS:** Vassiliki Bravis V<sup>1</sup>, Akaal Kaur<sup>1</sup>, Helen C Walkey<sup>1</sup>, Ian F Godsland<sup>1</sup>,  
22 Shivani Misra<sup>1</sup>, Polly J Bingley<sup>2</sup>, Alistair JK Williams<sup>2</sup>, David B Dunger<sup>3</sup>, Colin M  
23 Dayan<sup>4</sup>, Mark Peakman<sup>5</sup>, Nick S Oliver<sup>1</sup>, and Desmond G Johnston<sup>1</sup> on behalf of the  
24 ADDRESS-2 Management Committee, Patient Advocate Group and Investigators.  
25  
26  
27

28 <sup>1</sup>Department of Medicine, Imperial College London, Medical School, Norfolk Place  
29 London, W2 1PG, UK  
30  
31  
32  
33

34 <sup>2</sup>School of Clinical Sciences, University of Bristol, Southmead Hospital, Bristol, BS10  
35 5NB, UK  
36  
37

38 <sup>3</sup>Department of Paediatrics, University of Cambridge, Box 116, Level 8, Cambridge  
39 Biomedical Campus, Cambridge, CB2 0QQ, UK  
40  
41  
42

43 <sup>4</sup>School of Medicine, Cardiff University, Health Park, Cardiff, CF14 4XN, Wales, UK  
44

45 <sup>5</sup>Department of Immunobiology, King's College London, Guy's Hospital, Great Maze  
46 Pond, London, SE1 9RT, UK  
47  
48  
49  
50

51 **WORD COUNT: 3772**  
52  
53  
54  
55  
56  
57  
58  
59  
60

**COLLABORATORS****ADDRESS-2 Management Committee, Patient Advocate Group and****Investigators:**

AbithaKujambal V; Abouglila K; Ahmed J; Ahmed K; Ahmed M; Ahmed Z; Ajjan R;  
Akiboye F; Ali A; Ali K; Anand B; Anderson C; Andrews R; Anjum B; Anthony S; Aung  
T; Ayoola O; Baburaj R; Bain S; Baker E; Baksi A; Banerjee K; Banerjee M; Barnes D;  
Barnet A; Baynes K; Bellary S; Bennett S; Besser R; Bhardwaj P; Bhattacharya B;  
Bhimsaria S; Bickerton A; Bilous R; Bingham E; Bodmer C; Bridges N; Brooks A;  
Browne D; Buck J; Cackett N; Caldwell G; Campbell F; Carey P; Cavan D; Chandran  
S; Chandrasakaren S; Chang J; Chankramath A; Chant T; Chapman J; Chattington P;  
Chenoweth H; Chetan R; Chong J; Choudhary P; Cifelli P; Clark J; Cliff P; Coldwell S;  
Cooper C; Coppini D; Creely S; Cronin M; Cummings M; Dang C; Darzy K; Dashora  
U; Davies J; Davies M; Davies R; Day P; De Silva P; DelRio A; Delrio A; Desilva P;  
Dornhorst A; Douek I; Dougherty I; Dukhan K; Durkin S; Dutta A; Dutta S; Earle K;  
Edge J; Edmonds C; Edwards M; Elmati A; El-Reftee S; Elrishi M; Evans M; Field B;  
Flanagan D; Franke B; Gable D; Galliford T; Ganapathi J; Gibbs J; Gibson M; Gnudi L;  
Gough A; Gough S; Goulden P; Govier K; Greening J; Gupta A; Gupta S; Gurnell E;  
Hamilton-Shield J; Hammond P; Han T; Hanna F; Hanson P; Haq M; Hardy K; Harms  
B; Hattersley A; Hayward J; Heald A; Heffernan H; Heller S; Hinde F; Hitman G; Holt  
H; Howell S; Huma Z; Hyer S; Ian O; Idris I; Ijaz S; Iqbal N; Issa B; Jackson A;  
Jackson A; Jain N; Jennings P; John K; Johnson R; Jones S; Joseph F; Joseph J;  
Joseph S; Kalathil S; Kanumilli N; Kapoor R; Karandikar S; Kelly P; Kershaw M;  
Khetriwal B; Kumar K; Laji K; Lakhdar A; Lawrence J; Leong K; Levy D; Lowe A; Lyder  
G; Macklin A; Mallam K; Mallik R; Mann N; Mansell P; Margabanthu G; Massoud A;  
Mathew V; McAulay A; McCowen E; McCrea K; McGuigan M; Medici F; Mettayill J;

1 Millward A; Mitchell C; Modgil G; Mohanty R; Moodambail A; Mosely A; Moudiotis C;  
2  
3  
4 Muhi-Iddin N; Mukhtar M; Murphy N; Muzulu S; Myint K; Nagi D; Naik S; Narendran P;  
5  
6 Natarajan A; Nathan Y; Nayar R; Ng M; Ngwu U; Nikookam K; O'Connell I; Oelbaum  
7  
8 R; O'Hare P; Oliver N; O'Malley B; Oso O; Overend L; Owen C; Owen K; Padinjakara  
9  
10 N; Pai B; Pang T; Pargass N; Patel K; Pathy K; Paul P; Paul Smith J; Peakman M;  
11  
12 Petit A; Pettit A; Piel B; Pope R; Pothina N; Pothina N; Price H; Purewal T; Puthi V;  
13  
14 Puttha R; Puttha R; Rabbi T; Raffeeq P; Rahman S; Ranashinghe A; Randell T; Rathi  
15  
16 S; Rawal S; Rayman G; Regan F; Rice S; Riddle M; Robertson E; Robinson M;  
17  
18 Russell-Jones D; Russell-Taylor M; Rutter M; Sampson M; Samuel J; Sankar S;  
19  
20 Sankar V; Saravanan P; Satish H; Savine R; Scanlon J; Scobie I; Sennik D; Sharpe R;  
21  
22 Shekar S; Shekhar S; Simon G; Simpson H; Singh B; Singhal P; Smith D; Smith J;  
23  
24 Smith P; Solomon H; Srinivasan B; Sriraman R; Stirling H; Strutt J; Surridge A;  
25  
26 Sutchfield P; Tatnell S; Tharian K; Timmis A; Trevelyan N; Turner B; Valabhji J;  
27  
28 Venkatesh U; Vijayaraghavan S; Vijayaraman A; Vithian K; Vora J; Waldron-Lynch F;  
29  
30 Walker M; Walmsley D; Ward W; Watt A; Weaver J; Webber J; Weerasinghe K; West  
31  
32 N; Whitehead P; Whitelaw D; Wickramasuriya N; Wilding J; Williams P; Williams S;  
33  
34 Winkley K; Wright N; and Yaliwal C; Yarlagaadda S; Zac-Varghese S  
35  
36  
37  
38  
39  
40  
41  
42  
43  
44  
45  
46  
47  
48  
49  
50  
51  
52  
53  
54  
55  
56  
57  
58  
59  
60

## ABSTRACT

**Objectives:** To describe the characteristics of children and adults with incident type 1 diabetes in contemporary, multi-ethnic UK, focusing on differences between the islet autoantibody negative and positive.

**Design:** Observational cohort study.

**Setting:** 146 mainly secondary care centres across England and Wales.

**Participants:** 3,312 people aged  $\geq 5$  years were recruited within 6 months of a clinical diagnosis of type 1 diabetes via the National Institute for Health Research Clinical Research Network. 3,021 were of white European ethnicity and 291 (9%) were non-white. There was a small male predominance (57%). Young people  $< 17$  years comprised 59%.

**Main outcome measures:** Autoantibody status and characteristics at presentation.

**Results:** The majority presented with classical osmotic symptoms, weight loss, and fatigue. Ketoacidosis was common (42%), especially in adults, and irrespective of ethnicity. 35% were overweight or obese. Of the 1,778 participants who donated a blood sample, 85% were positive for one or more autoantibodies against glutamate decarboxylase, islet antigen-2, and zinc transporter 8. Presenting symptoms were similar in the autoantibody positive and negative participants, as was the frequency of ketoacidosis (43% vs 40%,  $p=0.3$ ). Autoantibody positivity was less common with increasing age ( $p=0.0001$ ), in males compared with females (82% vs 90%,  $p<0.0001$ ) and in people of non-white compared with white ethnicity (73% vs 86%,  $p<0.0001$ ). Body mass index was higher in autoantibody negative than positive adults (median, IQR 25.5, 23.1-29.2 vs 23.9, 21.4-26.7  $\text{kg/m}^2$ ;  $p=0.0001$ ). Autoantibody negative

1 participants were more likely to have a parent with diabetes (28% vs 16%,  $p < 0.0001$ )  
2  
3  
4 and less likely to have another autoimmune disease (4% vs 8%,  $p = 0.01$ ).  
5

6 **Conclusions:** Most people assigned a diagnosis of type 1 diabetes presented with  
7  
8 classical clinical features and islet autoantibodies. Although indistinguishable at an  
9  
10 individual level, autoantibody negative participants as a group demonstrated features  
11  
12 more typically associated with other diabetes subtypes.  
13  
14  
15  
16  
17  
18  
19  
20  
21  
22  
23  
24  
25  
26  
27  
28  
29  
30  
31  
32  
33  
34  
35  
36  
37  
38  
39  
40  
41  
42  
43  
44  
45  
46  
47  
48  
49  
50  
51  
52  
53  
54  
55  
56  
57  
58  
59  
60

For peer review only

## STRENGTHS AND LIMITATIONS OF THE STUDY

- We have studied a large multi-ethnic cohort of adults and children  $\geq 5$  years with clinically diagnosed incident type 1 diabetes in whom pancreatic islet autoantibodies were measured in a central laboratory.
- In routine practice, the initial assignment of a diagnosis of type 1 diabetes is a purely clinical one. The lack of further selection before inclusion in this study (e.g. based on autoantibody status and/or genetic testing) renders the results of particular relevance to standard clinical care.
- Individual autoantibody positive and negative patients were indistinguishable clinically but the size and diversity of the cohort permitted group differences to be detected at high levels of statistical significance, suggesting diagnostic heterogeneity.
- As this was a volunteer study recruiting from mainly secondary care centres, ascertainment bias could have been introduced.
- Provision of a blood sample was optional and autoantibody status was therefore available in just over half of the patients. Other than having a higher median age, this sub-group was representative of the whole cohort.

## INTRODUCTION

Type 1 diabetes (T1D) is an autoimmune disease that develops at any age, but most frequently in children and young adults.<sup>1</sup> Autoantibodies against islet antigens are typically present before, and for a variable time following, diagnosis.<sup>2-6</sup> Once initiated, beta cell damage classically leads to progressive loss of insulin secretion and a need for lifelong insulin treatment.

The diagnosis of T1D is a clinical one, but may be supported by the presence of one or more of the autoantibodies to islet-cell antigens. In routine care, autoantibody status may not be available at diagnosis, and may never be checked (management guidelines differ, with some not recommending their routine measurement or restricting measurements to situations where there is clinical doubt).<sup>7-9</sup> Previous studies suggest that 80-90% have detectable autoantibodies at disease onset,<sup>5,10</sup> with a background autoantibody prevalence of around 2% in the young general population.<sup>11</sup>

Autoantibody positivity may be lower in some non-white ethnic groups.<sup>12-16</sup> There is however uncertainty around the clinical and demographic correlates of autoantibody status in incident disease in an unselected multi-ethnic cohort including children and adults, using well characterised, validated assays. The After Diabetes Diagnosis REsearch Support System (ADDRESS), supported by the National Institute for Health Research (NIHR) Clinical Research Network (CRN), recruits people with incident T1D from centres across England and Wales. We aimed to characterise these people with reference to their heterogeneity, focusing on the associations of autoantibody status with variation in presentation characteristics.

## **METHODS**

### **Ethics approval**

Ethical approval was obtained from the South Central – Berkshire NHS Research Ethics Committee (reference 10/H0505/85). The project complies with the recommendations for research on human subjects by the 18th World Medical Assembly, Helsinki 1964 and later revisions and the International Conference on Harmonization Guideline for Good Clinical Practice (Topic E6 - 10 June 1996). Protocol details have been reported previously<sup>17</sup> and are therefore described in brief only.

### **Inclusion and exclusion criteria**

People with a clinician-assigned diagnosis of T1D aged  $\geq 5$  years were recruited within 6 months of diagnosis. Written, informed consent was obtained for all participants.

### **Data collection**

On recruitment: demographic information; medications including insulin(s); medical history, including that of autoimmune disease; family history of diabetes; blood pressure; weight and height; HbA1c; fasting or random blood glucose. A diagnosis of ketoacidosis was recorded if clinically assigned or if hyperglycaemia was accompanied by acidosis and either ketonaemia or ketonuria.<sup>17</sup> Ethnicity was self-reported as one of 16 categories.<sup>17</sup>

### **Project-specific blood sampling and measurement of islet autoantibodies**

Sample donation was voluntary.<sup>17</sup> Where collected, autoantibodies to glutamate decarboxylase (GADA), islet antigen-2 (IA-2A), and zinc transporter 8 (ZnT8A) were measured in sera using established radiobinding assays<sup>18 19</sup> in a single central laboratory. Antibodies to both major ZnT8 isoforms, defined by the polymorphic amino



1 acid at position 325 (Arginine, ZnT8RA or Tryptophan, ZnT8WA), were measured  
2 separately. Thresholds for autoantibody positivity were set at the 97<sup>th</sup> percentile of 974  
3 control samples for GADA, the 98<sup>th</sup> percentile of 500 control samples for IA-2A, and  
4 the 97·5<sup>th</sup> percentile of 523 healthy schoolchildren for both ZnT8RA and ZnT8WA.  
5  
6 Positive autoantibody status was defined as positive for one or more of GADA, IA-2A  
7 or either form of ZnT8A. In the 2015 Islet Autoantibody Standardization Program  
8 Workshop, the assay sensitivities and specificities achieved were 74% and 96·7% for  
9 GADA; 72% and 100% for IA-2A; 60% and 100% for ZnT8RA, and 46% and 100% for  
10 ZnT8WA, respectively.  
11  
12  
13  
14  
15  
16  
17  
18  
19  
20  
21  
22

### 23 **Data analysis**

24 Children were defined as aged <17 years. Body mass index (BMI) was derived as a z-  
25 score for children using World Health Organisation (WHO) (2007) reference data.<sup>20</sup> As  
26 a criterion for adiposity shared between children and adults, we applied WHO-  
27 recommended definitions of 'normal' weight (z-score <1, equivalent percentile  
28 <84·13% for children; BMI <25kg/m<sup>2</sup> for adults, both including underweight) as  
29 distinguished from 'overweight' (z-score ≥1, percentile ≥84·13% for children,<sup>21</sup> BMI  
30 ≥25kg/m<sup>2</sup> for adults,<sup>22</sup> both including obese). Parental and sibling history of diabetes  
31 was recorded. No attempt was made to differentiate between diabetes types in the  
32 family history. Variables were categorized as 'Individual Characteristics' and 'Diabetes  
33 Presentation'. We analysed data from participants recruited between 1<sup>st</sup> September  
34 2011 and 30<sup>th</sup> April 2016, with data querying and verification completed in November  
35 2016.  
36  
37  
38  
39  
40  
41  
42  
43  
44  
45  
46  
47  
48  
49  
50  
51

### 52 **Statistical analysis**

1 Statistical analysis was carried out using StataCorp. 2013 (*Stata Statistical Software:*  
2 *Release 13*. College Station, TX: StataCorp LP). Median and interquartile ranges  
3 (IQRs) were used to summarize continuous variables. Categorical variables were  
4 (IQRs) were used to summarize continuous variables. Categorical variables were  
5 (IQRs) were used to summarize continuous variables. Categorical variables were  
6 (IQRs) were used to summarize continuous variables. Categorical variables were  
7 (IQRs) were used to summarize continuous variables. Categorical variables were  
8 summarized as percentages. The Mann-Whitney U test and Kruskal-Wallis test were  
9 used for between-group comparisons of continuous variables. Chi-square testing was  
10 used for comparisons of categorical variables. Individual characteristics were explored  
11 as predictors of diabetes presentation and antibody status in univariate logistic and  
12 linear regression analyses. Multiple logistic and linear regression were used to  
13 establish the independence of predictors. A significance level of  $p < 0.05$  (two-sided)  
14 was taken as a guide to interpretation (actual p values down to  $p < 0.0001$  are reported  
15 throughout).

### 25 **Patient involvement**

26 Patient and public involvement groups within the NIHR CRN representing people with  
27 diabetes, and representing children and young people, had input into the design of the  
28 patient information sheets, consent forms, and recruitment strategies. After the start of  
29 recruitment, a patient advocate group was established to have input into aspects of  
30 study design and conduct, such as the procedures for accessing the data and stored  
31 biological samples, and communication with and engagement of participants, people  
32 with T1D, and healthcare professionals. The group is made up of adults with type 1  
33 diabetes and the parents of children with type 1 diabetes. Results are disseminated to  
34 participants via newsletters and other information about the study is published on the  
35 study website and on social media.

## RESULTS

### Overview of the cohort

#### *Individual characteristics*

Data were analyzed for 3,312 participants recruited with incident T1D (1,879 (57%) males, 1,946 (59%) children, from 146 centres, Table 1). The slight male predominance (57%) was more prominent in adults than in children (61% versus 54%,  $p<0.0001$ ). Islet autoantibodies were measured in the 1,778 participants who donated an optional blood sample. For individual characteristics, data recording was >98% complete for all variables except BMI (and 'overweight' - 88%) and records of having a sibling with diabetes (91%). Data recording for diabetes presentation features was >98% complete for all variables except symptom duration (94%). Sample sizes for incomplete data are reported in the Tables. Of the total cohort, people of white European origin comprised 91% ( $n=3021$ ), Asian (not Chinese) 3% ( $n=107$ ), African-Caribbean 2% ( $n=63$ ) and other or mixed ethnicity 3% ( $n=121$ ). Median time from diagnosis to recruitment was 71 days (IQR 40-119) and to blood sampling, 75 days (IQR 42-126). Of those with body weight measured ( $n=2911$ ), 35% were classified as overweight or obese, more commonly in adults than children (41% versus 31%,  $p<0.0001$ ). Where records of body weight were available within 28 days of diagnosis ( $n=554$ ), 35% were also overweight or obese (adults 40% versus children 29%,  $p<0.005$ ).

**Table 1. Clinical and demographic characteristics of the cohort (n=3312).**

|                                           | median (IQR) /<br>percentage (n) |
|-------------------------------------------|----------------------------------|
| <b>INDIVIDUAL CHARACTERISTICS</b>         |                                  |
| Age (years) (n=3312)                      | 14·6 (10·4, 26·4)                |
| Male (n=3312)                             | 57 (1879)                        |
| Children (<17y) (n=3312)                  | 59 (1946)                        |
| Body mass index (n=2911)                  |                                  |
| <i>Children (z score, n=1676)</i>         | 0·44 (-0·28, 1·23)               |
| <i>Adult (kg/m<sup>2</sup>, n=1235)</i>   | 24·1 (21·5, 27·1)                |
| Overweight or obese (n=2911)              | 35 (1033)                        |
| White European ethnicity (n=3312)         | 91 (3021)                        |
| Other autoimmune disease present (n=3270) | 6 (204)                          |
| Parent(s) with any diabetes (n=3261)      | 15 (499)                         |
| Sibling with any diabetes (n=3003)        | 8 (229)                          |
| <b>DIABETES PRESENTATION</b>              |                                  |
| Clinical presentation                     |                                  |
| <i>Ketoacidosis (n=3242)</i>              | 42 (1348)                        |
| <i>Osmotic symptoms (n=3286)</i>          | 96 (3158)                        |
| <i>Weight loss (n=3251)</i>               | 85 (2753)                        |
| <i>Fatigue (n=3252)</i>                   | 82 (2682)                        |
| Symptom duration (weeks, n=3105)          | 3 (2, 6)                         |
| Antibody positive (n=1778)                | 85 (1510)                        |

Abbreviations: IQR: interquartile range; BMI, body mass index.

Sample sizes (n) are given for each variable if data collection was incomplete.

Data collection for ketoacidosis at diabetes presentation was based on a record of it being assigned clinically, or of hyperglycaemia accompanied by acidosis and either ketonaemia or ketonuria. The children's body mass index z-score expressed as a percentile (median (IQR)) was 67% (39%, 89%) (n=1676).

## **The relationships between diabetes presentation and individual characteristics**

The main presenting features (Table 1) were: osmotic symptoms (polyuria and/or polydipsia) 96%; weight loss 85%; and fatigue 82%. Ketoacidosis was identified at clinical presentation in 42%. Another autoimmune disease was present in 6%; 15% had a parent with diabetes; 8% had a sibling with diabetes.

*The influence of age:* Increasing age was independently associated with an increased prevalence of ketoacidosis, weight loss, and fatigue at presentation, decreased prevalence of osmotic symptoms and longer symptom duration (Figure 1). In accord with its relationship with age, ketoacidosis was less common in children than adults (39% versus 45%,  $p=0.0002$ ). Although significant statistically, the differences between children and adults in other presenting symptoms were small (osmotic symptoms, 97% vs 95%,  $p=0.001$ ; weight loss, 82% vs 89%,  $p=0.0001$ ; fatigue, 78% vs 88%,  $p=0.0001$ , respectively), as were differences in symptom duration (median, 3 vs 4 weeks,  $p=0.0001$ ).

*The influence of gender:* Female sex was independently associated with longer symptom duration (Figure 1). Median symptom duration in females and males were 4 and 3 weeks, respectively ( $p=0.0001$ ).

*Associations with ethnicity:* There were no significant associations between ethnicity and initial clinical presentation, including ketoacidosis, which was equally likely: in white Europeans and non-whites (41% and 44%, respectively;  $p=0.3$ ).

*Family history of diabetes:* Having a parent with any diabetes was associated with a lower probability of presenting with ketoacidosis (Figure 1; 12% versus 18%,  $p<0.0001$ ). The same applied to those who had a sibling with diabetes (Figure 1: 5% versus 10%,  $p<0.0001$ ).

1  
2 *Other autoimmune disease:* The presence or absence of another autoimmune disease  
3  
4 had no significant influence on diabetes presentation.  
5  
6  
7  
8  
9  
10  
11  
12  
13  
14  
15  
16  
17  
18  
19  
20  
21  
22  
23  
24  
25  
26  
27  
28  
29  
30  
31  
32  
33  
34  
35  
36  
37  
38  
39  
40  
41  
42  
43  
44  
45  
46  
47  
48  
49  
50  
51  
52  
53  
54  
55  
56  
57  
58  
59  
60

For peer review only

**Table 2. Characteristics of pancreatic autoantibody (Ab) positive and negative participants (n=1778 with known antibody status); percentages (n) or medians (IQR) are shown.**

|                                              | Ab positive<br>(n=1510) | Ab negative<br>(n=268) | p       |
|----------------------------------------------|-------------------------|------------------------|---------|
| <b>INDIVIDUAL CHARACTERISTICS</b>            |                         |                        |         |
| Age                                          | 20·1 (13·1, 31·1)       | 31·4 (17·7, 41·0)      | 0·0001  |
| Male                                         | 56 (851)                | 72 (192)               | <0·0001 |
| Children                                     | 41 (614)                | 25 (66)                | <0·0001 |
| Body mass index                              |                         |                        |         |
| <i>Children (z score, n=545, 56)</i>         | 0·41 (-0·35, 1·19)      | 0·47 (-0·48, 0·97)     | 0·4     |
| <i>Adult ( kg/m<sup>2</sup>, n=825, 184)</i> | 23·9 (21·4, 26·7)       | 25·5 (23·1, 29·2)      | 0·0001  |
| Overweight (n=1370, 240)                     | 36 (490)                | 48 (114)               | 0·0005  |
| White European ethnicity                     | 86 (1413)               | 14 (232)               | <0·0001 |
| Other autoimmune disease (n=1495, 265)       | 8 (117)                 | 4 (10)                 | 0·01    |
| Parent(s) with any diabetes (n=1493, 261)    | 16 (233)                | 28 (74)                | <0·0001 |
| Siblings with any diabetes (n=1374, 238)     | 9 (117)                 | 8 (20)                 | 0·9     |
| <b>DIABETES PRESENTATION</b>                 |                         |                        |         |
| Clinical presentation                        |                         |                        |         |
| <i>Ketoacidosis (n=1483, 260)</i>            | 43 (639)                | 40 (104)               | 0·3     |
| <i>Osmotic symptoms (n=1495, 267)</i>        | 97 (1444)               | 94 (250)               | 0·02    |
| <i>Weight loss (n=1480, 267)</i>             | 87 (1285)               | 88 (235)               | 0·5     |
| <i>Fatigue (n=1490, 265)</i>                 | 86 (1282)               | 80 (213)               | 0·01    |
| Symptom duration (weeks, n=1424, 246)†       | 6·8 (10·5)              | 10·4 (32·2)            | 0·004   |

† median and IQRs for symptom duration were identical: 4 (2, 8); mean and SD is shown to clarify the direction of difference

Sample sizes (n) are given for each variable if data collection was incomplete.

1 The children's body mass index z-scores expressed as percentiles (median (IQR)) were 66%  
2 (36%, 88%) in the Ab positive (n=545) and 68% (32%, 83%) in the Ab negative (n=56).  
3  
4

### 5 **Description of the cohort in whom autoantibodies were measured**

6 Children comprised 38% of the sub-group of 1,778 participants who provided a blood  
7 sample for autoantibody measurement. The sub-group with blood samples was,  
8 accordingly, significantly older than the full cohort (median (IQR) 21·6 (13·4, 32·8) vs  
9 14·6 (10·4, 26·4) years,  $p<0\cdot0001$ ). Other parameters were similar. One or more  
10 autoantibodies were present in 85% of those who donated a blood sample.  
11  
12

### 13 **The relationships between autoantibody status and individual characteristics**

14 *The influence of age:* Autoantibody positivity decreased with increasing age; adults  
15 were less likely than children to be positive for one or more antibodies (82% vs 90%,  
16  $p<0\cdot0001$ ). The decline in autoantibody positivity continued throughout adult life  
17 (Figure 2). Of the individual autoantibodies, GADA were the most frequently observed  
18 in adults, with IA-2A and ZnT8A being relatively more common in children (Figure 2).  
19 The autoantibody positive adults were of lower BMI than autoantibody negative adults  
20 (BMI, median (IQR) 23·9 (21·4, 26·7) vs 25·5 (23·1, 29·2),  $p<0\cdot0001$ ) and they were  
21 less likely to be overweight or obese (40% vs 55%,  $p=0\cdot0001$ ). No relationship to BMI  
22 z-score was observed in children and there was no independent relationship between  
23 overweight/obesity and antibody positivity across children and adults (Figure 1).  
24  
25

26 *The influence of gender:* Females were more likely than males to be antibody positive  
27 (90% versus 82%, respectively ( $p<0\cdot0001$ )).  
28  
29

30 *Associations with ethnicity:* There was a statistically significant relationship between  
31 ethnicity and autoantibody status (on chi-squared analysis,  $p<0\cdot0001$ ). Amongst the 3  
32 major non-white ethnic groups (Asian; African-Caribbean; other or mixed ethnicity)  
33 numbers with autoantibodies measured were small (n=46, 36 and 51, respectively)  
34 and the proportion with autoantibody positivity did not differ significantly (70%, 64%  
35  
36  
37  
38  
39  
40  
41  
42  
43  
44  
45  
46  
47  
48  
49  
50  
51  
52  
53  
54  
55  
56  
57  
58  
59  
60



1 and 82%, respectively;  $p=0.1$ ). People of non-white ethnic origin were therefore  
2  
3  
4 grouped and comparisons limited to white European versus non-white ethnic origin.  
5  
6 White European ethnicity was independently associated with a higher prevalence of  
7  
8 autoantibody positivity compared with the combined non-white group (86% and 73%,  
9  
10 respectively;  $p<0.0001$ ; Figure 1).

11  
12 *Family history of diabetes:* People who had a parent with diabetes were less likely than  
13  
14 those without to have autoantibodies (Figure 1; 16% versus 28%,  $p<0.0001$ , Table 2).

15  
16 *Other autoimmune disease:* Another autoimmune disease was present in 204  
17  
18 participants and 117 of those in whom autoantibodies were measured. A history of  
19  
20 another autoimmune disease was positively associated with pancreatic islet  
21  
22 autoantibody positivity ( $p=0.01$ , Figure 1), being present in 8% of the autoantibody  
23  
24 positive and 4% of the autoantibody negative participants (Table 2).  
25  
26  
27  
28  
29

### 30 **The relationship between autoantibody status and diabetes presentation**

31  
32 A statistically significant relationship between positive autoantibody status and  
33  
34 diabetes presentation was restricted to a very small increase in prevalence of osmotic  
35  
36 symptoms (97% versus 94%,  $p=0.02$ , Table 2). There was no significant difference in  
37  
38 rates of ketoacidosis at presentation between autoantibody positive and negative  
39  
40 participants (43% versus 40%,  $p=0.3$ , Table 2).  
41  
42  
43  
44

## 45 **DISCUSSION**

46  
47 For the first time, relationships between autoantibody status (measured centrally in a  
48  
49 single reference laboratory) and phenotypic features in incident T1D are reported from  
50  
51 a large, unselected, multi-ethnic population of both children and adults. The study was  
52  
53 conducted with support from the NIHR CRN with most participants recruited from  
54  
55 specialist centres. Based on estimates of T1D incidence and population  
56  
57  
58  
59  
60

1 demographics,<sup>23 24</sup> 20-25% of eligible incident cases in England and Wales were  
2 recruited.  
3  
4

5  
6 Male predominance is unusual for an autoimmune condition but has been reported in  
7 adults with incident T1D.<sup>25</sup> In young children, the sex ratio has been reported to be  
8 close to unity.<sup>26</sup> In the present study the male excess was observed also in children,  
9 although the excess was less marked than in adults. Symptoms at presentation were  
10 as expected.<sup>27 28</sup> Although weight loss was common, average body weight at the time  
11 of recruitment was normal, and many participants were overweight or obese,  
12 especially adults. This was apparent even in people with body weight measurements  
13 obtained within 28 days of diagnosis, belying the belief that patients presenting with  
14 type 1 diabetes are underweight. An association between increased BMI and  
15 increased risk of progression from autoantibody positivity to development of diabetes  
16 in at-risk relatives has been reported previously.<sup>29</sup> Symptom duration was similar to  
17 that reported previously by others and was shorter in children than adults.<sup>30 31</sup> This  
18 may reflect parental vigilance of unwell children or a more insidious onset of clinical  
19 disease in older people.  
20  
21  
22  
23  
24  
25  
26  
27  
28  
29  
30  
31  
32  
33  
34  
35  
36

37 The overall frequency of ketoacidosis at diagnosis (42%) was high, and slightly more  
38 so in adults than children. It occurred with similar frequency in white European and  
39 non-white ethnic groups. The figure of 42% is higher than in previous reports from the  
40 UK (23% in a recent national paediatric audit,<sup>32</sup> 26-27% in regional studies<sup>33 34</sup>) and a  
41 range of 13-80% in those aged <20 years has been reported internationally.<sup>35</sup> A very  
42 similar figure (40.3%) has been reported recently for children in Italy.<sup>36</sup> Ketoacidosis at  
43 diagnosis is a quality issue as it reflects lack of awareness of diabetes features  
44 amongst professionals and the general population<sup>32</sup> and efforts to increase awareness  
45 lead to reductions in ketoacidosis at first presentation.<sup>37</sup> All methods of estimating the  
46  
47  
48  
49  
50  
51  
52  
53  
54  
55  
56  
57  
58  
59  
60

1 frequency of ketoacidosis at diagnosis have limitations, often leading to under-  
2 reporting.<sup>32</sup> Strengths of the current study include the large number of patients and the  
3 ability to confirm or refute the diagnosis where this was in doubt. A limitation is that  
4 ascertainment bias could be introduced because recruitment was mainly from  
5 secondary care and those who are the most ill at diagnosis may be the most likely to  
6 volunteer or to be referred. The higher ketoacidosis rate in adults versus children in  
7 our study appears at variance with the observation that ketoacidosis or severe  
8 ketoacidosis is more common in younger than in older children.<sup>28 33 36 38-40</sup> The current  
9 study did not include children <5 years of age, the group in childhood in whom  
10 ketoacidosis at diagnosis occurs most frequently<sup>41</sup>, and this may have contributed to  
11 the apparent children to adult difference. Of course, if such younger children had been  
12 included, this could have increased the overall rate of ketoacidosis even higher. The  
13 lower rate associated with having a parent or a sibling with diabetes could result from  
14 a heightened awareness of symptoms leading to earlier clinical referral.<sup>35</sup> The absence  
15 of any significant ethnic influence on ketoacidosis is at variance with some previous  
16 reports where higher rates were observed in non-white sub-groups.<sup>42 43</sup>  
17  
18 One or more islet autoantibodies were observed in 85% of participants, more  
19 commonly in female than male and in younger compared with older participants. This  
20 is compatible with previous literature from the UK and other countries,<sup>8 44-46</sup> although  
21 assay differences make such comparisons difficult. The positivity rate is higher than  
22 reported in people with T1D of non-white ethnic origin,<sup>12 13</sup> albeit with the same  
23 caveats and bearing in mind that the previous studies of ethnic influences on antibody  
24 status have been limited in size or age range of population studied. The slight female  
25 autoantibody preponderance has been observed in other studies in young children, but  
26 not in older children and young adults.<sup>47</sup> The higher autoantibody frequency in those  
27  
28  
29  
30  
31  
32  
33  
34  
35  
36  
37  
38  
39  
40  
41  
42  
43  
44  
45  
46  
47  
48  
49  
50  
51  
52  
53  
54  
55  
56  
57  
58  
59  
60

1 with a coexistent autoimmune disease reflects the clustering of autoimmune disorders  
2 observed in T1D and shared genetic susceptibility.<sup>48</sup> Overall, GADA were the  
3 antibodies most commonly present; while IA-2A and ZnT8A were seen most frequently  
4 in children, findings compatible with previous studies.<sup>47</sup> Insulin itself is considered a  
5 potential primary autoantigen as insulin autoantibodies are observed in incident T1D,  
6 especially in children<sup>30 31 49</sup>. In the current study, most participants had received insulin  
7 therapy for weeks before study entry and as they could have developed antibodies to  
8 the exogenous insulin, insulin autoantibodies were not measured. In prospective  
9 studies of infants at high genetic risk of T1D, insulin autoantibodies were often  
10 detected earlier than the other islet autoantibodies<sup>50 51</sup> and in consequence we may  
11 have underestimated the frequency of autoantibody positivity at diagnosis, especially  
12 in children.  
13  
14  
15  
16  
17  
18  
19  
20  
21  
22  
23  
24  
25  
26

27  
28 Although autoantibodies can be present for years in people with diabetes who do not  
29 require insulin treatment immediately,<sup>52-54</sup> and are present in some diagnosed clinically  
30 with type 2 diabetes,<sup>55</sup> they are generally regarded as a biomarker for T1D. In  
31 prospective studies they precede and predict the onset of T1D.<sup>56</sup> They typically  
32 disappear, or titres drop to very low levels, in the years following diagnosis.<sup>57</sup> In the  
33 autoantibody negative participants studied here, several explanations may be  
34 proposed. *First*, insulin autoantibodies were not measured. *Second*, autoantibodies to  
35 as yet unknown antigens may have been present.<sup>58</sup> The identification of tetraspanin-7  
36 as an autoantigen could, for example, account for some apparently antibody negative  
37 participants,<sup>59</sup> although recent data suggest this is unlikely to account for large  
38 numbers.<sup>60</sup> *Third*, autoantibodies may have disappeared or their levels diminished, by  
39 the time of sampling. As all participants were recruited within six months of diagnosis,  
40 this is unlikely to be a major factor. *Fourth*, autoantibodies might develop  
41  
42  
43  
44  
45  
46  
47  
48  
49  
50  
51  
52  
53  
54  
55  
56  
57  
58  
59  
60

1 subsequently, as reported previously for islet cell antibodies in a small proportion of  
2 patients.<sup>61</sup> *Fifth*, some people may have autoimmune T1D without a humoral  
3 response. *Finally*, people may actually have another diabetes sub-type. The  
4 autoantibody negative participants as a group tended to be older and, if adult, more  
5 overweight. These features are compatible with type 2 diabetes. They were more  
6 likely to have a parent with diabetes, typical of type 2 or monogenic diabetes. They  
7 were more likely to be of non-white ethnicity, more associated with type 2 diabetes.  
8 Those with ketoacidosis could have ketosis-prone diabetes (so-called idiopathic  
9 diabetes)<sup>62</sup> as this is difficult to distinguish from T1D at first presentation. Further  
10 studies and follow-up of the cohort are planned to explore the extent to which T1D  
11 without detectable autoantibodies describes a sub-group of T1D that is distinct from  
12 other diabetes sub-types.  
13  
14  
15  
16  
17  
18  
19  
20  
21  
22  
23  
24  
25  
26  
27  
28  
29  
30  
31  
32  
33  
34  
35  
36  
37  
38  
39  
40  
41  
42  
43  
44  
45  
46  
47  
48  
49  
50  
51  
52  
53  
54  
55  
56  
57  
58  
59  
60

## ACKNOWLEDGEMENTS

We are grateful to Nish Chaturvedi and Joanne Holloway who provided much advice and support at the initiation of the project and to Simon Howell for chairing the Management Committee. We thank the ADDRESS-2 Patient Advocate Group for their input into aspects of study design and conduct. We also thank Kyla Chandler, Claire Williams and antibody laboratory technicians at the University of Bristol for the assay of islet autoantibodies, Flora Christofi for study administrative support at Imperial College London, and all the local research teams at participating centres. We are grateful to colleagues, George Alberti, Robert Elkeles, Rochan Agha-Jaffar, Ahmed El-Laboudi, Neil Hill, Monica Reddy and Shivshankar Seechurn for their critical review of early analyses of the results.

## FUNDING AND SPONSORSHIP

The National Institute for Health Research (NIHR) provided the funding for the research infra-structure of the national Clinical Research Network (CRN), with project-specific support from Diabetes UK (grant numbers 09/0003919 & 15/0005234) and the Juvenile Diabetes Research Foundation (grant numbers 9-2010-407 & 3-SRA-2015-36-A-N).

The funders were consulted about the vision for a UK-based type 1 diabetes ascertainment network. They had no involvement in study design, data collection, data analysis, data interpretation, or writing of the article, and took no part in the decision to submit for publication. The funders are represented on the management committee that oversees access to the data and stored biological samples. The funding was administered as a grant to Imperial College London. Imperial College London is the study Sponsor.

## DATA SHARING

The full anonymous dataset is available to access via a management committee, which includes people living with type 1 diabetes, scientists, clinicians and funder representatives as members.<sup>17</sup> Participants gave informed consent for data sharing subject to conditions described in the access procedure documents available from the study website: [www.address2.org](http://www.address2.org).

## COMPETING INTERESTS

All authors have completed the ICMJE uniform disclosure form at [www.icmje.org/coi\\_disclosure.pdf](http://www.icmje.org/coi_disclosure.pdf) and declare: funding from Diabetes UK and the Juvenile Diabetes Research Foundation administered as grants to Imperial College London for the submitted work; no financial relationships with any organisations that might have an interest in the submitted work in the previous three years; no other relationships or activities that could appear to have influenced the submitted work.

## CONTRIBUTORSHIP

### Author contributions

Literature searches were carried out by authors VB, HCW, IFG, NSO and DGJ. Authors AK, HCW, IFG, AJKW, PJB, DBD and DGJ were involved in the study design. Data collection was coordinated by authors AK and HCW. Authors AK, HCW and IFG were responsible for data management. Authors AJKW and PJB were responsible for autoantibody measurements. The statistical analysis plan was developed by IFG. Analysis of the data was by authors VB, AK and IFG. Data were interpreted by all authors (VB, AK, HCW, IFG, SM, PJB, AJKW, DBD, CMD, MP, NSO and DGJ). The manuscript was prepared by authors VB, AK, HCW, IFG, AJKW and DGJ. Critical revisions were made by authors PJB, DBD, CMD, MP and NSO. Figures were prepared by authors AK, HCW and IFG.

1 The Management Committee oversaw access to the data and stored biological  
2 samples. The Patient Advocate Group had input into aspects of study conduct. Local  
3 investigators were responsible for the recruitment of participants and collection of  
4 data.  
5  
6  
7  
8  
9

## 10 **GUARANTORSHIP**

11  
12  
13 Dr Walkey accepts full responsibility for the finished article and confirms that she had  
14 full access to all the data in the study and was responsible for the decision to submit  
15 for publication. Dr Walkey affirms that the manuscript is an honest, accurate, and  
16 transparent account of the study being reported; that no important aspects of the study  
17 have been omitted; and that any discrepancies from the study as planned have been  
18 explained.  
19  
20  
21  
22  
23  
24  
25  
26  
27  
28  
29  
30  
31  
32  
33  
34  
35  
36  
37  
38  
39  
40  
41  
42  
43  
44  
45  
46  
47  
48  
49  
50  
51  
52  
53  
54  
55  
56  
57  
58  
59  
60



**REFERENCES**

1. Todd J. Etiology of type 1 diabetes. *Immunity* 2010;32:457-67.
2. Palmer J, Asplin C, Clemon sP, et al. Insulin antibodies in insulin-dependent diabetics before insulin treatment. *Science* 1983;222:1337-9.
3. Bonifacio E, Genovese S, Braghi S, et al. Islet autoantibody markers in IDDM: risk assessment strategies yielding high sensitivity. *Diabetologia* 1995;38:816-22.
4. Graham J, Hagopian W, Kockum I, et al. Genetic effects on age-dependent onset and islet cell autoantibody markers in type 1 diabetes. *Diabetes* 2002;51:1346-55.
5. Wenzlau JM, Juhl K, Yu L, et al. The cation efflux transporter ZnT8 (Slc30A8) is a major autoantigen in human type 1 diabetes. *Proc Natl Acad Sci U S A* 2007;104(43):17040-5.
6. Tridgell DM, Spiekerman C, Wang RS, et al. Interaction of onset and duration of diabetes on the percent of GAD and IA-2 antibody-positive subjects in the type 1 diabetes genetics consortium database. *Diabetes care* 2011;34(4):988-93.
7. Chiang J, Kirkman S, Laffel L, et al. Type 1 Diabetes Through the Life Span: A Position Statement of the American Diabetes Association. *Diabetes Care* 2014;37:2034-54.
8. National Institute for Health and Care Excellence. Type 1 diabetes in adults: diagnosis and management. NICE guideline, 2015.
9. National Institute for Health and Care Excellence. Diabetes (type 1 and type 2) in children and young people: diagnosis and management. NICE guideline, 2015.
10. Hameed S, Ellard S, Woodhead HJ, et al. Persistently autoantibody negative (PAN) type 1 diabetes mellitus in children. *Pediatr Diabetes* 2011;12(3 Pt 1):142-9.
11. Knip M, Korhonen S, Kulmala P, et al. Prediction of type 1 diabetes in the general population. *Diabetes care* 2010;33(6):1206-12.
12. Libman IM, Pietropaolo M, Arslanian SA, et al. Evidence for heterogeneous pathogenesis of insulin-treated diabetes in black and white children. *Diabetes Care* 2003;26(10):2876-82.
13. Dabelea D, Pihoker C, Talton JW, et al. Etiological approach to characterization of diabetes type: the SEARCH for Diabetes in Youth Study. *Diabetes care* 2011;34(7):1628-33.
14. Black MH, Lawrence JM, Pihoker C, et al. HLA-associated phenotypes in youth with autoimmune diabetes. *Pediatr Diabetes* 2013;14(2):121-8.
15. Wenzlau JM, Frisch LM, Hutton JC, et al. Changes in Zinc Transporter 8 Autoantibodies Following Type 1 Diabetes Onset: The Type 1 Diabetes

- 1  
2 Genetics Consortium Autoantibody Workshop. *Diabetes Care* 2015;38 Suppl  
3 2:S14-20.
- 4  
5 16. Dzidzonu DK, Skrivarhaug T, Joner G, et al. Ethnic differences in the incidence of  
6 type 1 diabetes in Norway: a register-based study using data from the period  
7 2002-2009. *Pediatr Diabetes* 2016;17(5):337-41.
- 8  
9 17. Walkey HC, Kaur, A., Bravis, V., Godsland, I.F., Misra, S., Williams, A.J.K.,  
10 Bingley, P.J., Dunger, D.B., Oliver, N., Johnston, D.G. Rationale and protocol  
11 for the After Diabetes Diagnosis REsearch Support System (ADDRESS): an  
12 incident and high risk type 1 diabetes UK cohort study. *BMJ Open*  
13 2017;7:e013956.
- 14  
15 18. Bonifacio E, Yu L, Williams AK, et al. Harmonization of glutamic acid  
16 decarboxylase and islet antigen-2 autoantibody assays for National Institute of  
17 Diabetes and Digestive and Kidney Diseases Consortia. *J Clin Endocrinol*  
18 *Metab* 2010;95(7):3360-7.
- 19  
20 19. Long AE, Gooneratne AT, Rokni S, et al. The role of autoantibodies to zinc  
21 transporter 8 in prediction of type 1 diabetes in relatives: lessons from the  
22 European Nicotinamide Diabetes Intervention Trial (ENDIT) cohort. *J Clin*  
23 *Endocrinol Metab* 2012;97(2):632-7.
- 24  
25 20. de Onis M, Onyango AW, Borghi E, et al. Development of a WHO growth  
26 reference for school-aged children and adolescents. *Bulletin of the World*  
27 *Health Organization* 2007;85:660-7.
- 28  
29 21. de Onis M, Lobstein T. Defining obesity risk status in the general childhood  
30 population: which cut-offs should we use? *Int J Pediatr Obes* 2010;5(6):458-60.
- 31  
32 22. WHO. Physical status: the use and interpretation of anthropometry. Report of a  
33 WHO expert Committee. WHO Technical Report Series. Geneva: World Health  
34 Organisation, 1995.
- 35  
36 23. Patterson CC, Dahlquist GG, Gyürüs E, et al. Incidence trends for childhood type  
37 1 diabetes in Europe during 1989-2003 and predicted new cases 2005-20: a  
38 multicentre prospective registration study. *Lancet* 2009;13:2027-33.
- 39  
40 24. Office for National Statistics. 2011 Census: Aggregate data (England and Wales)  
41 [computer file]. UK Data Service Census Support (This information is licensed  
42 under the terms of the Open Government Licence  
43 <http://www.nationalarchives.gov.uk/doc/open-government-licence/version/2>)  
44 2011 [Available from: <http://infuse.ukdataservice.ac.uk> accessed 11 July 2016].
- 45  
46 25. Diaz-Valencia P, Bougnères P, Valleron A-J. Global epidemiology of type 1  
47 diabetes in young adults and adults: a systematic review. *BMC Public Health*  
48 2015;15:255-70.
- 49  
50 26. Soltesz G, Patterson C, Dahlquist G. Worldwide childhood type 1 diabetes  
51 incidence—what can we learn from epidemiology? *Pediatr Diabetes* 2007;8  
52 Suppl 6:6-14.
- 53  
54  
55  
56  
57  
58  
59  
60

- 1 27. Thomas NJ, Jones SE, Weedon MN, et al. Frequency and phenotype of type 1  
2 diabetes in the first six decades of life: a cross-sectional, genetically stratified  
3 survival analysis from UK Biobank. *Lancet Diabetes Endocrinol* 2017  
4
- 5 28. Dabelea D, Stafford JM, Mayer-Davis EJ, et al. Association of Type 1 Diabetes vs  
6 Type 2 Diabetes Diagnosed During Childhood and Adolescence With  
7 Complications During Teenage Years and Young Adulthood. *JAMA*  
8 2017;317(8):825-35.  
9
- 10 29. Ferrara CT, Geyer SM, Liu YF, et al. Excess BMI in Childhood: A Modifiable Risk  
11 Factor for Type 1 Diabetes Development? *Diabetes Care* 2017;40(5):698-701.  
12
- 13 30. Karjalainen J, Salmela P, Ilonen J, et al. A comparison of childhood and adult type  
14 I diabetes mellitus. *N Engl J Med* 1989;320:881-6.  
15
- 16 31. Sabbah E, Savola K, Ebeling T, et al. Genetic, autoimmune, and clinical  
17 characteristics of childhood- and adult-onset type 1 diabetes. *Diabetes care*  
18 2000;23(9):1326-32.  
19
- 20 32. National Paediatric Diabetes Audit. National Diabetes Paediatric Audit 2012-2015  
21 Report 2: hospital admissions and complications: Royal College of Paediatrics  
22 and Child Health, 2017.  
23
- 24 33. Pinkney JH, Bingley PJ, Sawtell PA, et al. Presentation and progress of childhood  
25 diabetes mellitus: a prospective population-based study. The Bart's-Oxford  
26 Study Group. *Diabetologia* 1994;37(1):70-4.  
27
- 28 34. Alvi NS, Davies P, Kirk JM, et al. Diabetic ketoacidosis in Asian children. *Arch Dis*  
29 *Child* 2001;85:60-1.  
30
- 31 35. Usher-Smith JA, Thompson M, Ercole A, et al. Variation between countries in the  
32 frequency of diabetic ketoacidosis at first presentation of type 1 diabetes in  
33 children: a systematic review. *Diabetologia* 2012;55(11):2878-94.  
34
- 35 36. Cherubini V, Skrami E, Ferrito L, et al. High frequency of diabetic ketoacidosis at  
36 diagnosis of type 1 diabetes in Italian children: a nationwide longitudinal study,  
37 2004-2013. *Sci Rep* 2016;6:38844.  
38
- 39 37. Vanelli M, Chiari G, Lacava S, et al. Campaign for diabetic ketoacidosis prevention  
40 still effective 8 years later. *Diabetes Care* 2007;30(4):e12.  
41
- 42 38. Rewers A, Klingensmith G, Davis C, et al. Presence of diabetic ketoacidosis at  
43 diagnosis of diabetes mellitus in youth: the Search for Diabetes in Youth Study.  
44 *Pediatrics* 2008;121(5):e1258-66.  
45
- 46 39. Lokulo-Sodipe K, Moon RJ, Edge JA, et al. Identifying targets to reduce the  
47 incidence of diabetic ketoacidosis at diagnosis of type 1 diabetes in the UK.  
48 *Arch Dis Child* 2014;99(5):438-42.  
49
- 50 40. Choleau C, Maitre J, Filipovic Pierucci A, et al. Ketoacidosis at diagnosis of type 1  
51 diabetes in French children and adolescents. *Diabetes Metab* 2014;40(2):137-  
52 42.  
53

- 1 41. National Paediatric Diabetes Audit Project Board. National Diabetes Paediatric  
2 Audit Report 2011-12: Part 2 hospital admissions and complications: Royal  
3 College of Paediatrics and Child Health, 2014.
- 4  
5 42. Sundaram PC, Day E, Kirk JM. Delayed diagnosis in type 1 diabetes mellitus. *Arch*  
6 *Dis Child* 2009;94(2):151-2.
- 7  
8 43. Usher-Smith JA, Thompson MJ, Sharp SJ, et al. Factors associated with the  
9 presence of diabetic ketoacidosis at diagnosis of diabetes in children and  
10 young adults: a systematic review. *BMJ* 2011;343:d4092.
- 11  
12 44. Gorus FK, Goubert P, Semakula C, et al. IA-2-autoantibodies complement  
13 GAD65-autoantibodies in new-onset IDDM patients and help predict impending  
14 diabetes in their siblings. The Belgian Diabetes Registry. *Diabetologia*  
15 1997;40(1):95-9.
- 16  
17 45. Long AE, Gillespie KM, Rokni S, et al. Rising incidence of type 1 diabetes is  
18 associated with altered immunophenotype at diagnosis. *Diabetes*  
19 2012;61(3):683-6.
- 20  
21 46. Perchard R, MacDonald D, Say J, et al. Islet autoantibody status in a multi-ethnic  
22 UK clinic cohort of children presenting with diabetes. *Arch Dis Child*  
23 2015;100:348-52.
- 24  
25 47. Pihoker C, Gilliam LK, Hampe CS, et al. Autoantibodies in diabetes. *Diabetes*  
26 2005;54 Suppl 2:S52-61.
- 27  
28 48. Kawasaki E, Takino H, Yano M, et al. Autoantibodies to glutamic acid  
29 decarboxylase in patients with IDDM and autoimmune thyroid disease.  
30 *Diabetes* 1994;43:80-86.
- 31  
32 49. Bosi E, Boulware DC, Becker DJ, et al. Impact of Age and Antibody Type on  
33 Progression From Single to Multiple Autoantibodies in Type 1 Diabetes  
34 Relatives. *J Clin Endocrinol Metab* 2017;102(8):2881-86.
- 35  
36 50. Parikka V, Nanto-Salonen K, Saarinen M, et al. Early seroconversion and rapidly  
37 increasing autoantibody concentrations predict prepubertal manifestation of  
38 type 1 diabetes in children at genetic risk. *Diabetologia* 2012;55(7):1926-36.
- 39  
40 51. Ziegler AG, Bonifacio E, Group B-BS. Age-related islet autoantibody incidence in  
41 offspring of patients with type 1 diabetes. *Diabetologia* 2012;55(7):1937-43.
- 42  
43 52. Naik RG, Palmer JP. Latent autoimmune diabetes in adults (LADA). *Rev Endocr*  
44 *Metab Disord* 2003;4:233-41.
- 45  
46 53. Maruyama T, Nakagawa T, Kasuga A, et al. Heterogeneity among patients with  
47 latent Autoimmune diabetes in adults. *Diabetes Metab Res Rev* 2011;27:971-  
48 74.
- 49  
50 54. Buzzetti R, Zampetti S, Maddaloni E. Adult-onset autoimmune diabetes: current  
51 knowledge and implications for management. *Nat Rev Endocrinol*  
52 2017;13(11):674-86.
- 53  
54  
55  
56  
57

- 1  
2  
3  
4  
5  
6  
7  
8  
9  
10  
11  
12  
13  
14  
15  
16  
17  
18  
19  
20  
21  
22  
23  
24  
25  
26  
27  
28  
29  
30  
31  
32  
33  
34  
35  
36  
37  
38  
39  
40  
41  
42  
43  
44  
45  
46  
47  
48  
49  
50  
51  
52  
53  
54  
55  
56  
57  
58  
59  
60
55. Palmer JP, Hampe CS, Chiu H, et al. Is latent autoimmune diabetes in adults distinct from type 1 diabetes or just type 1 diabetes at an older age? *Diabetes* 2005;54:62-67.
56. Williams AJK, Bingley PJ. Worth the wait: type 1 diabetes prospective birth cohort studies enter adolescence. *Diabetologia* 2012;55:1873-6.
57. Wod M, Yderstraede KB, Halekoh U, et al. Metabolic risk profiles in diabetes stratified according to age at onset, islet autoimmunity and fasting C-peptide. *Diabetes Res Clin Pract* 2017;134:62-71.
58. Pietropaolo M, Towns R, Eisenbarth GS. Humoral autoimmunity in type 1 diabetes: prediction, significance, and detection of distinct disease subtypes. *Cold Spring Harb Perspect Med* 2012;2:a012831.
59. McLaughlin KA, Richardson CC, Ravishankar A, et al. Identification of Tetraspanin-7 as a Target of Autoantibodies in Type 1 Diabetes. *Diabetes* 2016;65(6):1690-8.
60. Walther D, Eugster A, Jergens S, et al. Tetraspanin 7 autoantibodies in type 1 diabetes. *Diabetologia* 2016;59(9):1973-6.
61. Borg H, Gottsater A, Fernlund P, et al. A 12-year prospective study of the relationship between islet antibodies and beta-cell function at and after the diagnosis in patients with adult-onset diabetes. *Diabetes* 2002;51(6):1754-62.
62. American Diabetes Association. Standards of Medical Care in Diabetes-2016 Abridged for Primary Care Providers. *Clin Diabetes* 2016;34(1):3-21.

## Figure captions

### Figure 1. Individual characteristics as predictors of diabetes presentation and autoantibody status.

Univariate logistic regression odds ratios or linear regression coefficients (circles), 95% CIs (horizontal lines)<sup>#</sup> and statistical significances are shown. Red circles signify that a significant univariate relationship was sustained on multivariable analysis with all individual characteristics included as predictor variables (participants with complete data: n=2911-3312) and in the sub-group with antibodies measured (participants with complete data including antibody status: n=1610-1778)

**Footnotes:** <sup>#</sup> for 'Age' odds ratios or coefficients and 95% CIs were derived from standardised data

\* not significant in sub-group with antibodies measured on multivariable analysis

\*\* significant in sub-group with antibodies measured on multivariable analysis

† not significant on multivariable analysis

†† significant on multivariable analysis

### Figure 2. The percentage of participants exhibiting islet autoantibodies (any and individual) autoantibody in relation to age at diagnosis.

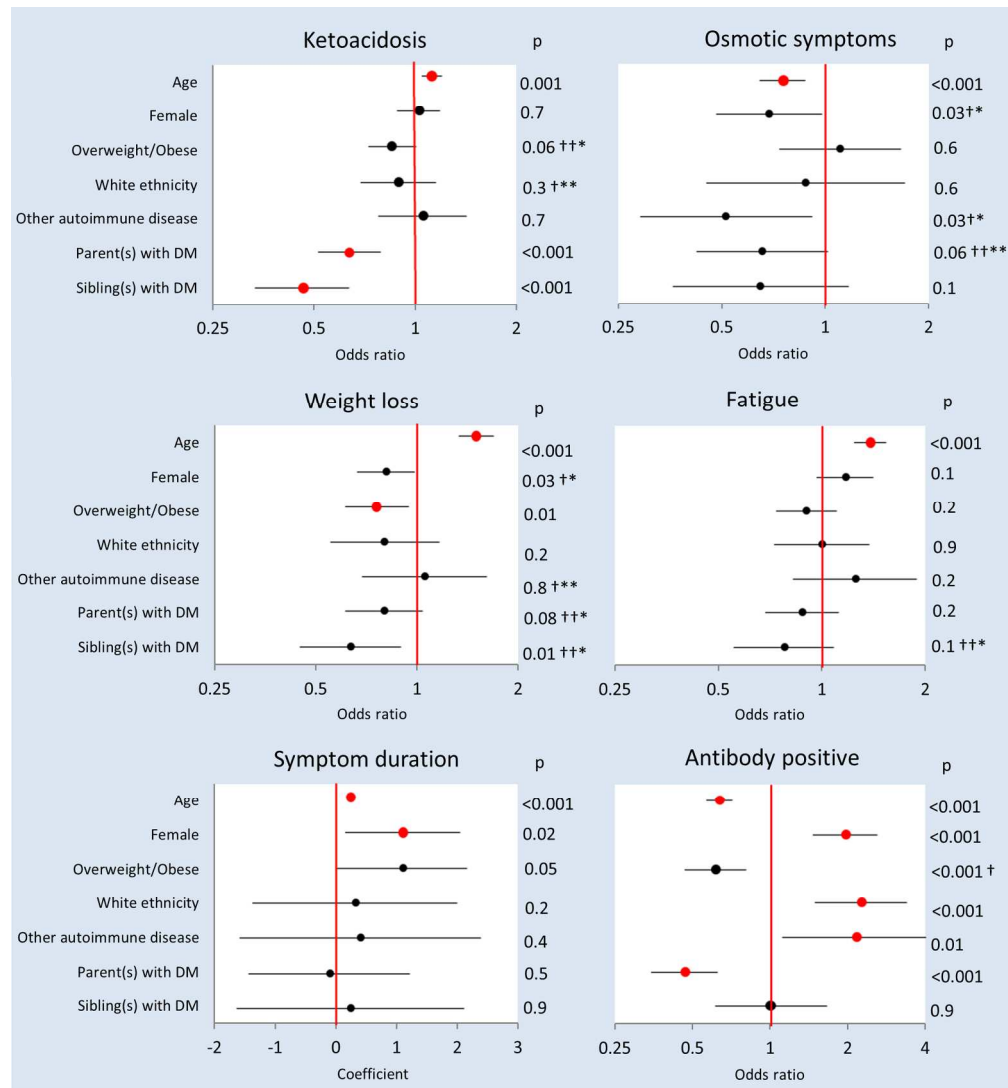

Univariate logistic regression odds ratios or linear regression coefficients (circles), 95% CIs (horizontal lines)# and statistical significances are shown. Red circles signify that a significant univariate relationship was sustained on multivariable analysis with all individual characteristics included as predictor variables (participants with complete data: n=2911-3312) and in the sub-group with antibodies measured (participants with complete data including antibody status: n=1610-1778)

Footnotes: # for 'Age' odds ratios or coefficients and 95% CIs were derived from standardised data

\* not significant in sub-group with antibodies measured on multivariable analysis

\*\* significant in sub-group with antibodies measured on multivariable analysis

† not significant on multivariable analysis

†† significant on multivariable analysis

172x186mm (300 x 300 DPI)



Figure 2. The percentage of participants exhibiting islet autoantibodies (any and individual) autoantibody in relation to age at diagnosis.

141x90mm (300 x 300 DPI)



STROBE Statement—Checklist of items that should be included in reports of *cohort studies*

|                           | Item No | Recommendation                                                                                                                                                                       | Page                                                                           |
|---------------------------|---------|--------------------------------------------------------------------------------------------------------------------------------------------------------------------------------------|--------------------------------------------------------------------------------|
| <b>Title and abstract</b> | 1       | (a) Indicate the study's design with a commonly used term in the title or the abstract                                                                                               | 1                                                                              |
|                           |         | (b) Provide in the abstract an informative and balanced summary of what was done and what was found                                                                                  | 4-5                                                                            |
| <b>Introduction</b>       |         |                                                                                                                                                                                      |                                                                                |
| Background/rationale      | 2       | Explain the scientific background and rationale for the investigation being reported                                                                                                 | 7                                                                              |
| Objectives                | 3       | State specific objectives, including any prespecified hypotheses                                                                                                                     | 7                                                                              |
| <b>Methods</b>            |         |                                                                                                                                                                                      |                                                                                |
| Study design              | 4       | Present key elements of study design early in the paper                                                                                                                              | 8-9 & protocol paper (BMJ Open 2017;7:e013956)                                 |
| Setting                   | 5       | Describe the setting, locations, and relevant dates, including periods of recruitment, exposure, follow-up, and data collection                                                      | 8- <del>6</del> 9, 11 & protocol paper (BMJ Open 2017;7:e013956)               |
| Participants              | 6       | (a) Give the eligibility criteria, and the sources and methods of selection of participants. Describe methods of follow-up                                                           | 8 & protocol paper (BMJ Open 2017;7:e013956)                                   |
|                           |         | (b) For matched studies, give matching criteria and number of exposed and unexposed                                                                                                  | N/A                                                                            |
| Variables                 | 7       | Clearly define all outcomes, exposures, predictors, potential confounders, and effect modifiers. Give diagnostic criteria, if applicable                                             | 8-9 & protocol paper (BMJ Open 2017;7:e013956)                                 |
| Data sources/measurement  | 8*      | For each variable of interest, give sources of data and details of methods of assessment (measurement). Describe comparability of assessment methods if there is more than one group | 8-9 & protocol paper (BMJ Open 2017;7:e013956)                                 |
| Bias                      | 9       | Describe any efforts to address potential sources of bias                                                                                                                            | <u>1920</u>                                                                    |
| Study size                | 10      | Explain how the study size was arrived at                                                                                                                                            | 8, 11, <u>1849</u> & protocol paper (BMJ Open 2017;7:e013956) (ongoing cohort) |
| Quantitative variables    | 11      | Explain how quantitative variables were handled in the analyses. If applicable, describe which groupings were chosen and why                                                         | 8-9                                                                            |
| Statistical methods       | 12      | (a) Describe all statistical methods, including those used to control for confounding                                                                                                | 8-9                                                                            |
|                           |         | (b) Describe any methods used to examine subgroups and interactions                                                                                                                  | 8-9, <u>1314</u> (ethnic groups) <u>1648</u> (autoantibody subgroup)           |
|                           |         | (c) Explain how missing data were addressed                                                                                                                                          | 11, Tables 1- <u>24</u> (12-13, <u>15-1616-18</u> ) & Figure 1                 |
|                           |         | (d) If applicable, explain how loss to follow-up was addressed                                                                                                                       | N/A                                                                            |
|                           |         | (e) Describe any sensitivity analyses                                                                                                                                                | N/A                                                                            |

| <b>Results</b>           |     |                                                                                                                                                                                                              |                                                                                          |
|--------------------------|-----|--------------------------------------------------------------------------------------------------------------------------------------------------------------------------------------------------------------|------------------------------------------------------------------------------------------|
| Participants             | 13* | (a) Report numbers of individuals at each stage of study—eg numbers potentially eligible, examined for eligibility, confirmed eligible, included in the study, completing follow-up, and analysed            | 8, <del>1819</del> & protocol paper (BMJ Open 2017;7:e013956)                            |
|                          |     | (b) Give reasons for non-participation at each stage                                                                                                                                                         | 8 & protocol paper (BMJ Open 2017;7:e013956)                                             |
|                          |     | (c) Consider use of a flow diagram                                                                                                                                                                           | Not complex: diagnosed and recruited or not, blood sample given or not.                  |
| Descriptive data         | 14* | (a) Give characteristics of study participants (eg demographic, clinical, social) and information on exposures and potential confounders                                                                     | 11 & Table 1 (12- <del>13</del> )                                                        |
|                          |     | (b) Indicate number of participants with missing data for each variable of interest                                                                                                                          | 11, Tables 1- <del>24</del> (12-13, <del>15-1616-18</del> ) & Figure 1                   |
|                          |     | (c) Summarise follow-up time (eg, average and total amount)                                                                                                                                                  | N/A data from recruitment only                                                           |
| Outcome data             | 15* | Report numbers of outcome events or summary measures over time                                                                                                                                               | N/A                                                                                      |
| Main results             | 16  | (a) Give unadjusted estimates and, if applicable, confounder-adjusted estimates and their precision (eg, 95% confidence interval). Make clear which confounders were adjusted for and why they were included | 11- <del>1718</del> , Tables 1- <del>42</del> (12-13, <del>15-1616-18</del> ) & Figure 1 |
|                          |     | (b) Report category boundaries when continuous variables were categorized                                                                                                                                    | 9 & Figure 2                                                                             |
|                          |     | (c) If relevant, consider translating estimates of relative risk into absolute risk for a meaningful time period                                                                                             | N/A                                                                                      |
| Other analyses           | 17  | Report other analyses done—eg analyses of subgroups and interactions, and sensitivity analyses                                                                                                               | <del>1618</del> (autoantibody subgroup)                                                  |
| <b>Discussion</b>        |     |                                                                                                                                                                                                              |                                                                                          |
| Key results              | 18  | Summarise key results with reference to study objectives                                                                                                                                                     | <del>17-2119-22</del>                                                                    |
| Limitations              | 19  | Discuss limitations of the study, taking into account sources of potential bias or imprecision. Discuss both direction and magnitude of any potential bias                                                   | <del>17-2119-22</del>                                                                    |
| Interpretation           | 20  | Give a cautious overall interpretation of results considering objectives, limitations, multiplicity of analyses, results from similar studies, and other relevant evidence                                   | <del>17-2119-22</del>                                                                    |
| Generalisability         | 21  | Discuss the generalisability (external validity) of the study results                                                                                                                                        | 6, <del>2122</del>                                                                       |
| <b>Other information</b> |     |                                                                                                                                                                                                              |                                                                                          |
| Funding                  | 22  | Give the source of funding and the role of the funders for the present study and, if applicable, for the original study on which the present article is based                                                | <del>2223</del>                                                                          |

1 \*Give information separately for exposed and unexposed groups.  
2  
3

4 **Note:** An Explanation and Elaboration article discusses each checklist item and gives methodological background and  
5 published examples of transparent reporting. The STROBE checklist is best used in conjunction with this article (freely  
6 available on the Web sites of PLoS Medicine at <http://www.plosmedicine.org/>, Annals of Internal Medicine at  
7 <http://www.annals.org/>, and Epidemiology at <http://www.epidem.com/>). Information on the STROBE Initiative is  
8 available at <http://www.strobe-statement.org>.  
9  
10  
11  
12  
13  
14  
15  
16  
17  
18  
19  
20  
21  
22  
23  
24  
25  
26  
27  
28  
29  
30  
31  
32  
33  
34  
35  
36  
37  
38  
39  
40  
41  
42  
43  
44  
45  
46  
47  
48  
49  
50  
51  
52  
53  
54  
55  
56  
57  
58  
59  
60

For peer review only
